# Supplementary material for: Anti-Neuroinflammatory Agent, Restricticin B, from the Marine-Derived Fungus Penicillium janthinellum and Its Inhibitory Activity on the NO Production in BV-2 Microglia Cells
Source: PubMed Central journal article supplement (PMC7551942; doi:10.3390/md18090465), 2020-09-14
Supplement: marinedrugs-18-00465-s001.pdf [file marinedrugs-18-00465-s001.pdf]

## Supplementary data

# Anti-neuroinflammatory Agent, Restricticin B from the Marine-Derived Fungus *Penicillium janthinellum* and Its Inhibitory Activity on the NO Production in BV-2 Microglia Cells

Byeoung-Kyu Choi<sup>1</sup>, Song-Hee Jo<sup>2</sup>, Dong-Kuk Choi<sup>2</sup>, Phan Thi Hoai Trinh<sup>3</sup>, Hwa-Sun Lee<sup>1</sup>, Cao Van Anh<sup>1,4</sup>, Tran Thi Thanh Van<sup>3</sup>, and Hee Jae Shin<sup>1,4,\*</sup>

1 Marine Natural Products Chemistry Laboratory, Korea Institute of Ocean Science and Technology, 385 Haeyang-ro,

Yeongdo-gu, Busan 49111, Korea; choibk4404@kiost.ac.kr (B.-K.C.), hwasunlee@kiost.ac.kr (H.-S.L.);

caovananh@kiost.ac.kr (C.V.A.)

2 Department of Applied Life Science, Graduate school of Konkuk University, Chungju 27478, Korea;

wowsong333@naver.com (S.-H.J.), choidek@kku.ac.kr (D.-K.C.)

3 Department of Marine Biotechnology, Nhatrang Institute of Technology Research and Application, Vietnam

Academy of Science and Technology, 02 Hung Vuong, Nha Trang 650000, Vietnam; phanhoaitrinh84@gmail.com

(P.T.H.T.); tranthanhvan@nitra.vast.vn (T.T.T.V.)

4 Department of Marine Biotechnology, University of Science and Technology (UST), 217 Gajungro, Yuseong-gu,

Daejeon 34113, Korea

---

\*Corresponding author. Tel.: +82-51-664-3341; fax: +82-51-664-3340; e-mail: shinhj@kiost.ac.kr

# Contents

|                                                                                                                                                                                                   |    |
|---------------------------------------------------------------------------------------------------------------------------------------------------------------------------------------------------|----|
| Figure S1. HRESIMS data of restricticin B ( <b>1</b> ).-----                                                                                                                                      | 1  |
| Figure S2. <sup>1</sup> H NMR spectrum of restricticin B ( <b>1</b> ).-----                                                                                                                       | 2  |
| Figure S3. <sup>13</sup> C NMR spectrum of restricticin B ( <b>1</b> ).-----                                                                                                                      | 2  |
| Figure S4. COSY spectrum of restricticin B ( <b>1</b> ).-----                                                                                                                                     | 3  |
| Figure S5. HSQC spectrum of restricticin B ( <b>1</b> ).-----                                                                                                                                     | 4  |
| Figure S6. HMBC spectrum of restricticin B ( <b>1</b> ).-----                                                                                                                                     | 5  |
| Figure S7. <sup>1</sup> H NMR spectrum of restricticin B ( <b>1</b> ) in CDCl <sub>3</sub> .-----                                                                                                 | 6  |
| Figure S8. NOESY spectrum of restricticin B ( <b>1</b> ).-----                                                                                                                                    | 7  |
| Table S1. Comparison of <sup>1</sup> H and <sup>13</sup> C NMR data for <b>1a</b> (major) and <b>1b</b> (minor)<br>at 500 MHz and 150 MHz in CD <sub>3</sub> OD( $\delta$ in ppm, $J$ in Hz)----- | 8  |
| Figure S9. NOESY spectrum of restricticin B ( <b>1</b> ) for EXSY correlations.-----                                                                                                              | 9  |
| Figure S10. Comparison of the <sup>1</sup> H NMR data between <b>1</b> and <b>6</b> .-----                                                                                                        | 10 |
| Figure S11. HRESIMS data of N-acetyl restricticin ( <b>2</b> ).-----                                                                                                                              | 11 |
| Figure S12. <sup>1</sup> H NMR spectrum of N-acetyl restricticin ( <b>2</b> ).-----                                                                                                               | 12 |
| Figure S13. <sup>13</sup> C NMR spectrum of N-acetyl restricticin ( <b>2</b> ).-----                                                                                                              | 12 |
| Figure S14. LRMS data of 3,3''-dihydroxy-6'- desmethyl terphenyllin ( <b>3</b> ).-----                                                                                                            | 13 |
| Figure S15. <sup>1</sup> H NMR spectrum of 3,3''-dihydroxy-6'- desmethyl terphenyllin ( <b>3</b> ).-----                                                                                          | 14 |
| Figure S16. <sup>13</sup> C NMR spectrum of 3,3''-dihydroxy-6'- desmethyl terphenyllin ( <b>3</b> ).-----                                                                                         | 14 |
| Figure S17. HRESIMS data of fellutanine B ( <b>4</b> ).-----                                                                                                                                      | 15 |
| Figure S18. <sup>1</sup> H NMR spectrum of fellutanine B ( <b>4</b> ).-----                                                                                                                       | 16 |
| Figure S19. <sup>13</sup> C NMR spectrum of fellutanine B ( <b>4</b> ).-----                                                                                                                      | 16 |
| Figure S20. LRMS data of 10,23-dihydro-24,25-dehydro aflavinin ( <b>5</b> ).-----                                                                                                                 | 17 |
| Figure S21. <sup>1</sup> H NMR spectrum of 10,23-dihydro-24,25-dehydro aflavinin ( <b>5</b> ).-----                                                                                               | 18 |
| Figure S22. <sup>13</sup> C NMR spectrum of 10,23-dihydro-24,25-dehydro aflavinin ( <b>5</b> ).-----                                                                                              | 19 |
| Figure S23. DFT optimized conformers and populations of restricticin B (1'S,2'R,3'S,4'S)<br>above 5% population.-----                                                                             | 20 |
| Table S2. Gibbs free energies and Boltzmann distribution of conformers of compound <b>1</b> .-----                                                                                                | 20 |
| Table S3–S7. ECD calculation and energy minimized coordinates of conformer <b>1–5</b><br>for all atoms (Å).-----                                                                                  | 21 |

## Elemental Composition Report

### Single Mass Analysis

Tolerance = 5.0 PPM / DBE: min = -1.5, max = 50.0

Element prediction: Off

Number of isotope peaks used for i-FIT = 3

### Monoisotopic Mass, Even Electron Ions

70 formula(e) evaluated with 1 results within limits (all results (up to 1000) for each mass)

Elements Used:

C: 1-30 H: 1-40 N: 1-3 O: 1-10 Na: 1-1

| Mass     | Calc. Mass | mDa  | PPM  | DBE | i-FIT | Norm | Conf(%) | Formula                                                          |
|----------|------------|------|------|-----|-------|------|---------|------------------------------------------------------------------|
| 496.2306 | 496.2311   | -0.5 | -1.0 | 9.5 | 679.3 | n/a  | n/a     | C <sub>26</sub> H <sub>35</sub> N <sub>7</sub> O <sub>7</sub> Na |

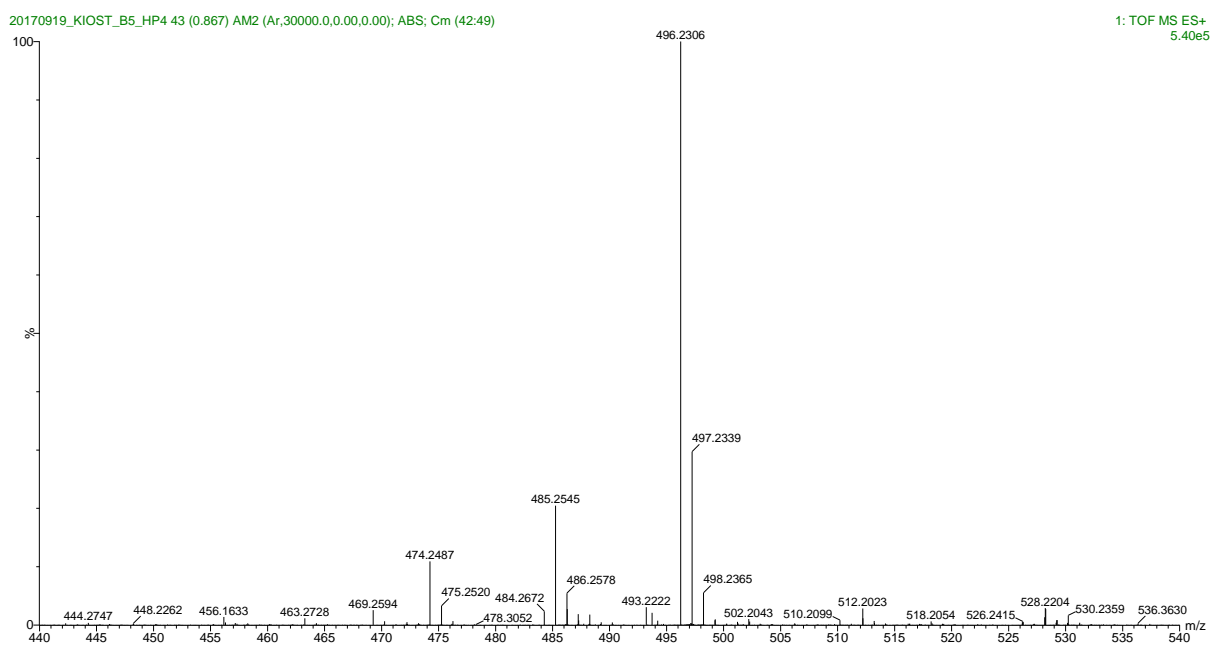

Figure S1. HRESIMS data of restrictin B (1).



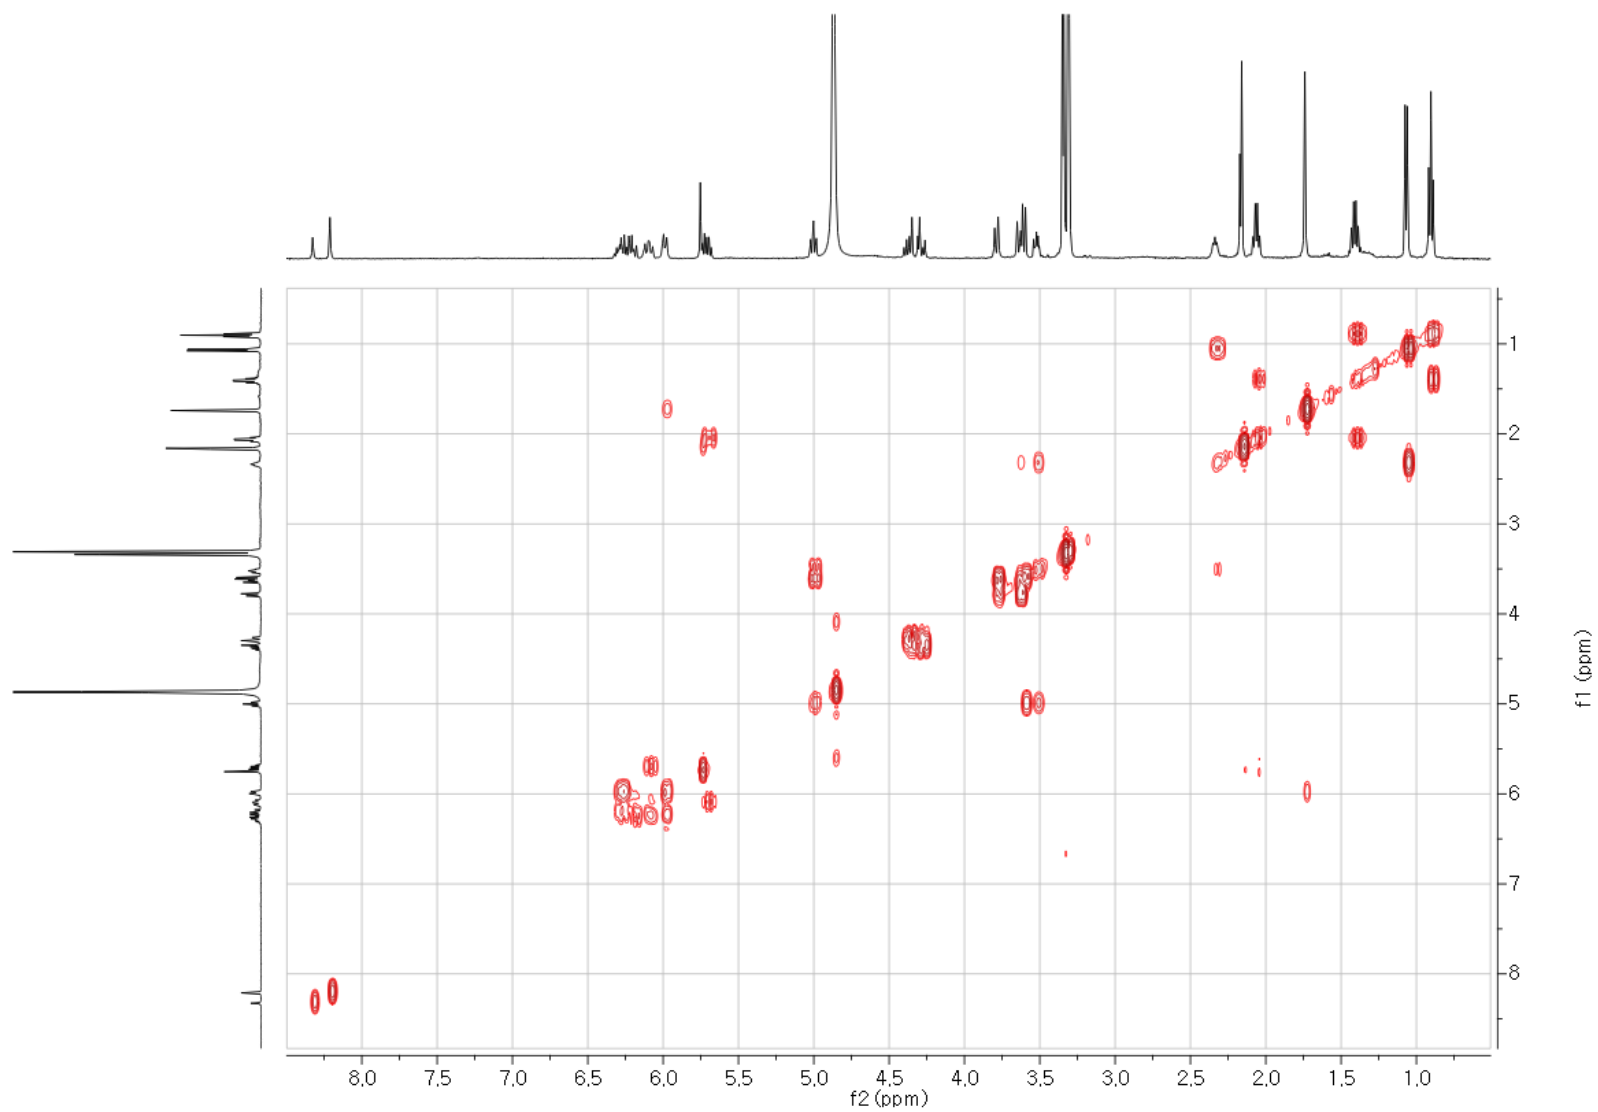

Figure S4. COSY spectrum of restricticin B (**1**).

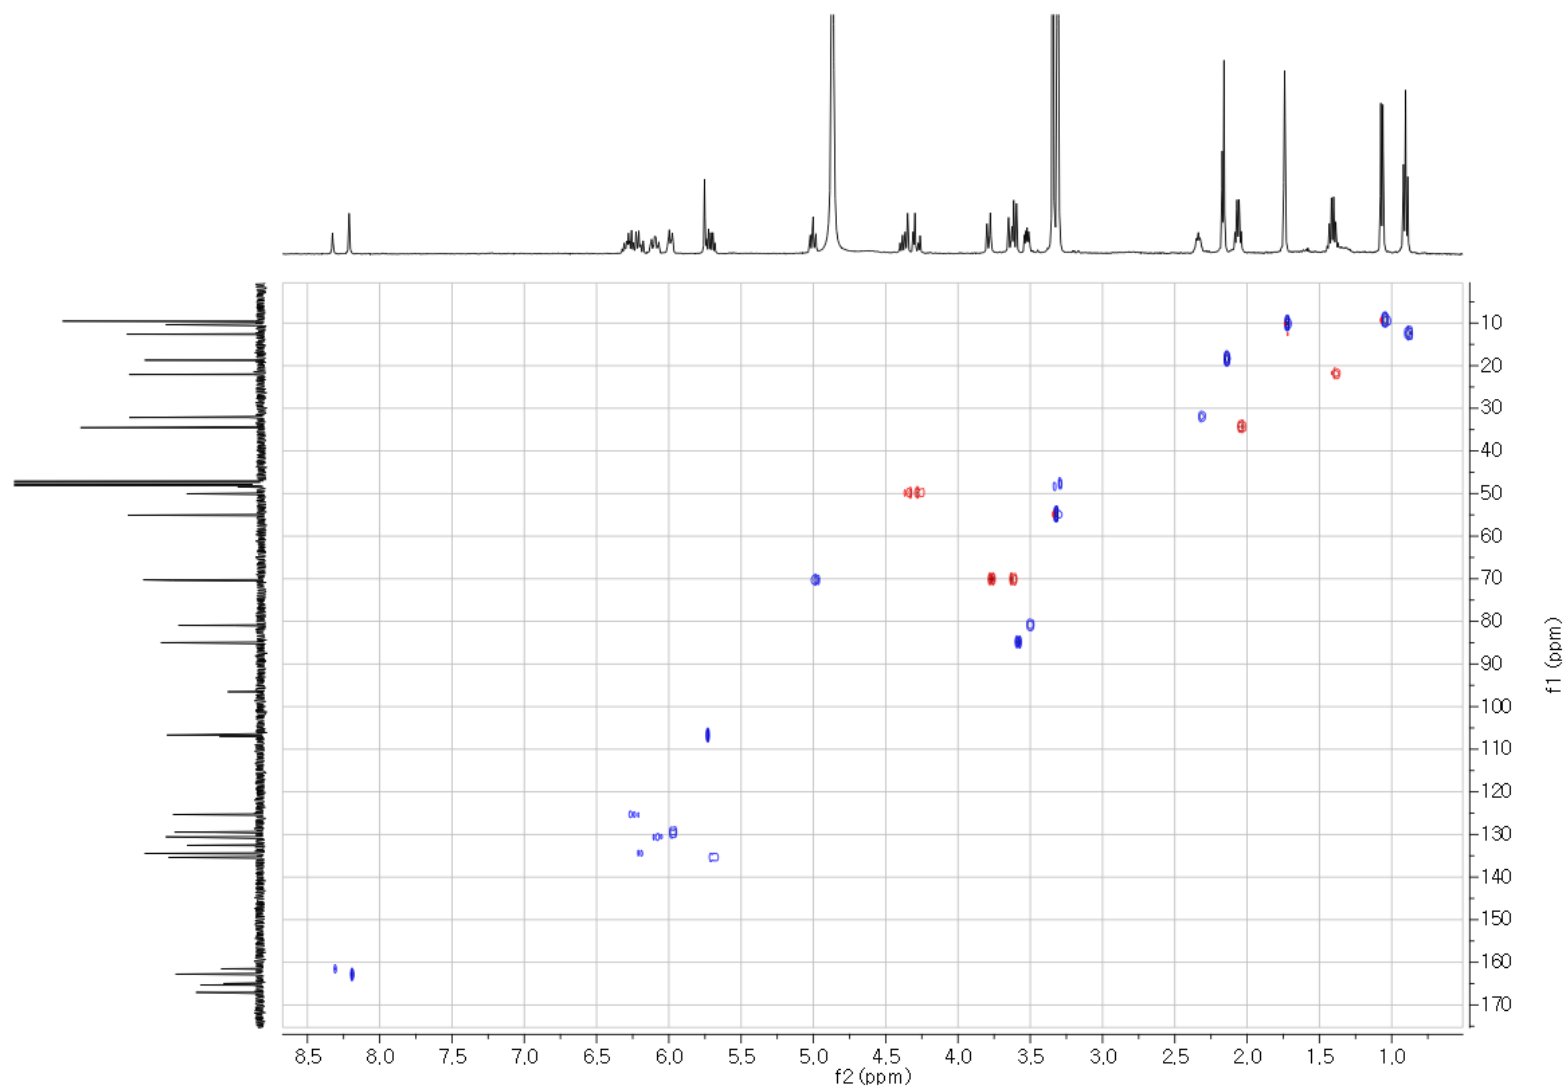

Figure S5. HSQC spectrum of restricticin B (1).

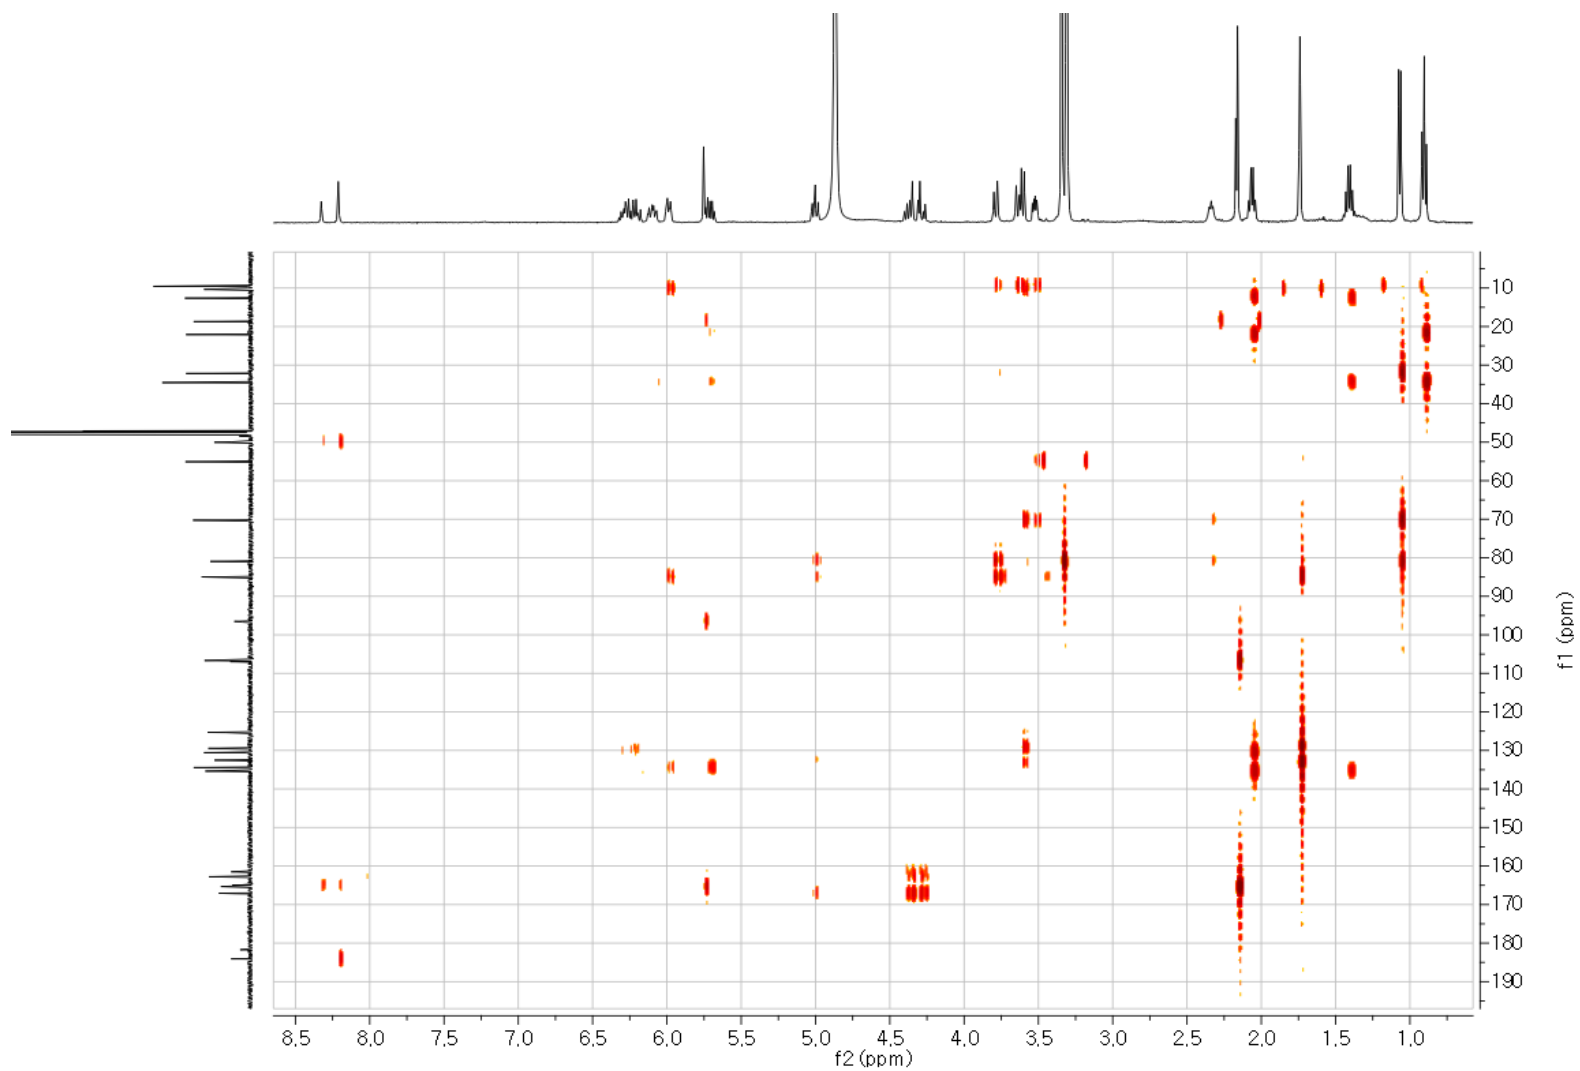

Figure S6. HMBC spectrum of restricticin B (**1**).

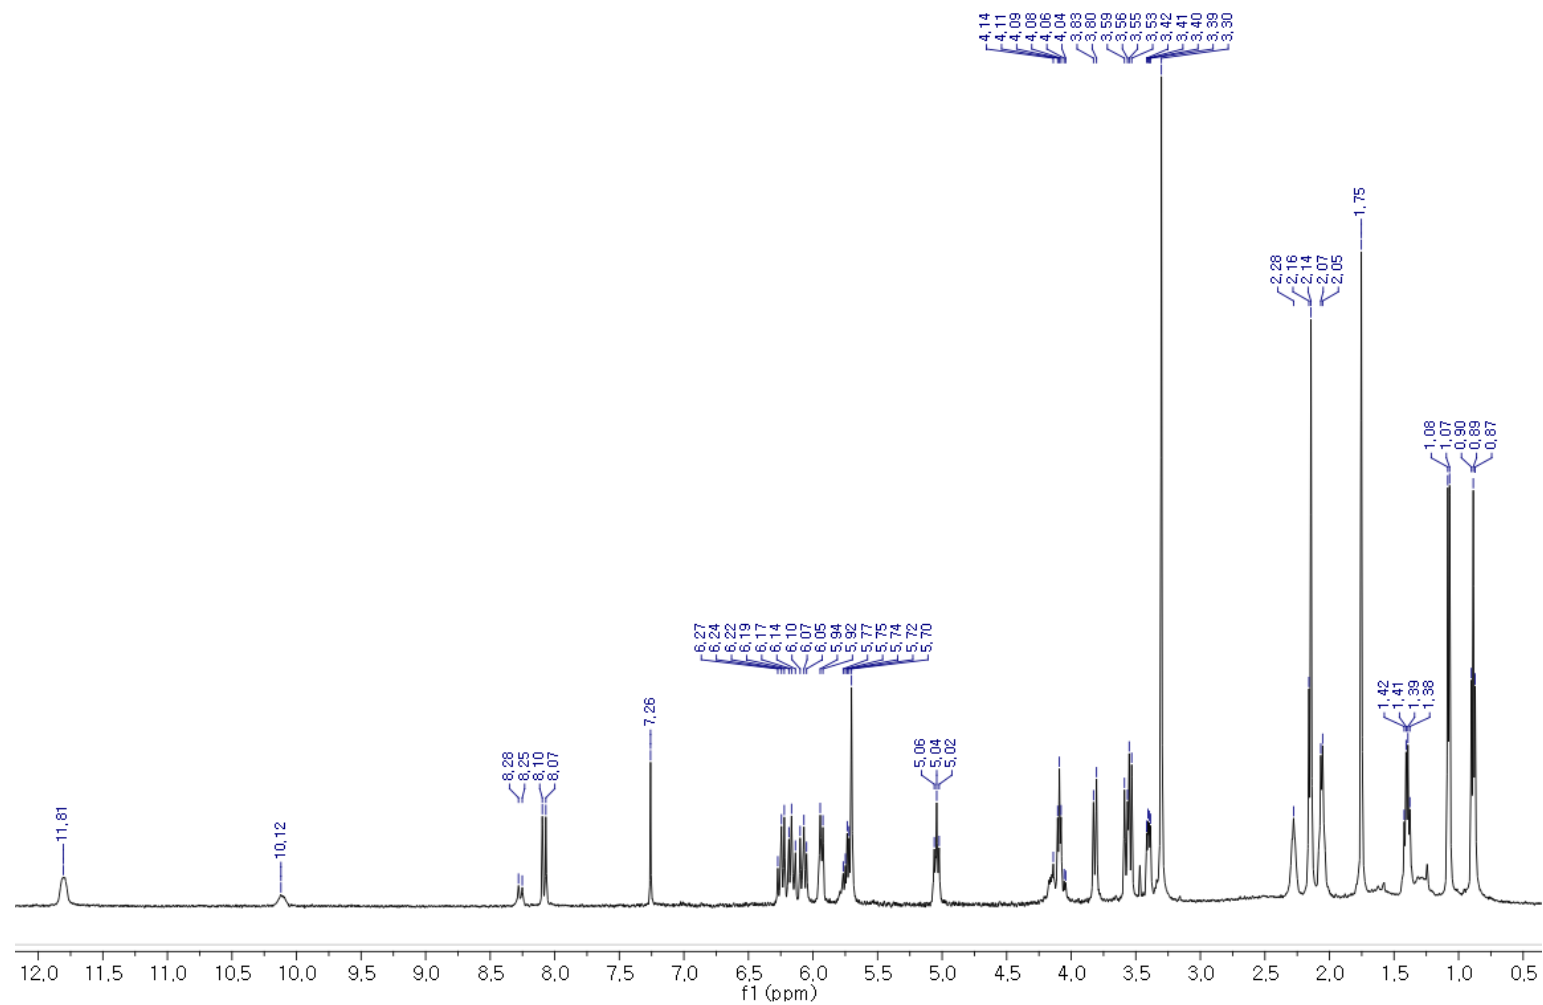

Figure S7.  $^1\text{H}$  NMR spectrum of restricticin B (**1**) in  $\text{CDCl}_3$ .



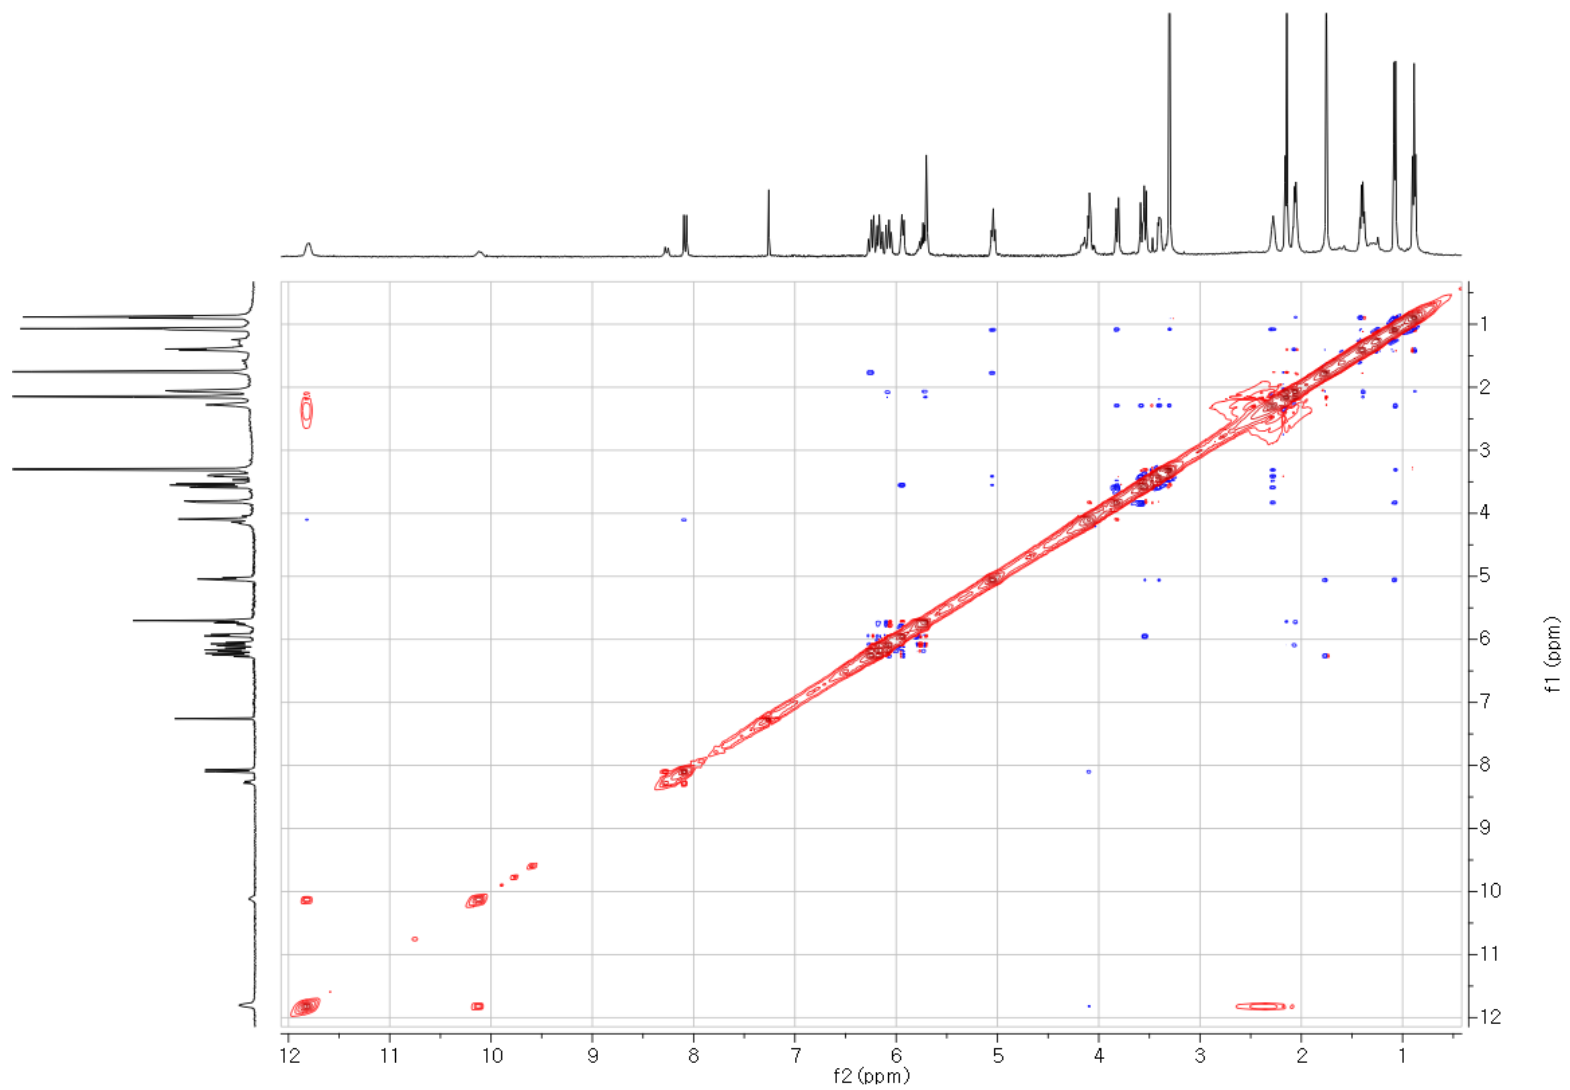

Figure S8. NOESY spectrum of restricticin B (1).

Table S1. Comparison of <sup>1</sup>H and <sup>13</sup>C NMR data for isomer 1 (major) and isomer 1 (minor) at 500 MHz and 150 MHz in CD<sub>3</sub>OD (δ in ppm, J in Hz)

| Position | 1 (Major)                |                  |                | 1 (Minor)                |                  |                |
|----------|--------------------------|------------------|----------------|--------------------------|------------------|----------------|
|          | δ <sub>H</sub> (J in Hz) | Type             | δ <sub>C</sub> | δ <sub>H</sub> (J in Hz) | Type             | δ <sub>C</sub> |
| 1'       | 3.60 (d, 9.5)            | CH               | 84.9           | 3.60 (d, 9.5)            | CH               | 84.9           |
| 2'       | 5.00 (dd, 9.5, 9.5)      | CH               | 70.4           | 5.00 (dd, 9.5, 9.5)      | CH               | 70.4           |
| 3'       | 3.52, m                  | CH               | 81.0           | 3.52, m                  | CH               | 81.0           |
| 4'       | 2.33, m                  | CH               | 32.1           | 2.33, m                  | CH               | 32.1           |
| 5'       | 3.63 (d, 12.0)           | CH <sub>2</sub>  | 70.2           | 3.63 (d, 12.0)           | CH <sub>2</sub>  | 70.2           |
|          | 3.78 (d, 12.0)           |                  |                | 3.78 (d, 12.0)           |                  |                |
| 1        | 1.74, s                  | CH <sub>3</sub>  | 10.4           | 1.74, s                  | CH <sub>3</sub>  | 10.4           |
| 2        |                          | C                | 132.5          |                          | C                | 132.5          |
| 3        | 5.98 (d, 10.5)           | CH               | 129.5          | 5.98 (d, 10.5)           | CH               | 129.5          |
| 4        | 6.27 (dd, 14.5, 10.0)    | CH               | 125.3          | 6.27 (dd, 14.5, 10.0)    | CH               | 125.3          |
| 5        | 6.21 (dd, 14.5, 10.0)    | CH               | 134.4          | 6.21 (dd, 14.5, 10.0)    | CH               | 134.4          |
| 6        | 6.08 (dd, 15.0, 10.5)    | CH               | 130.6          | 6.08 (dd, 15.0, 10.5)    | CH               | 130.6          |
| 7        | 5.70, m                  | CH               | 135.3          | 5.70, m                  | CH               | 135.3          |
| 8        | 2.05 (q, 7.0)            | CH <sub>2</sub>  | 34.5           | 2.05 (q, 7.0)            | CH <sub>2</sub>  | 34.5           |
| 9        | 1.40, m                  | CH <sub>2</sub>  | 22.0           | 1.40, m                  | CH <sub>2</sub>  | 22.0           |
| 10       | 0.90 (t, 7.5)            | CH <sub>3</sub>  | 12.6           | 0.90 (t, 7.5)            | CH <sub>3</sub>  | 12.6           |
| 11       | 1.06 (d, 7.0)            | CH <sub>3</sub>  | 9.5            | 1.06 (d, 7.0)            | CH <sub>3</sub>  | 9.5            |
| 12       | 3.33, s                  | OCH <sub>3</sub> | 55.0           | 3.33, s                  | OCH <sub>3</sub> | 55.0           |
| 13       |                          | C                | 167.2          |                          | C                | 167.1          |
| 14       | 4.27 (d, 18.0)           | CH <sub>2</sub>  | 50.0           | 4.29 (d, 18.0)           | CH <sub>2</sub>  | 49.9           |
|          | 4.36 (d, 18.0)           |                  |                | 4.38 (d, 18.0)           |                  |                |
| NH       | 11.8, brs                |                  |                | 10.1, brs                |                  |                |
| 1''      | 8.20, s                  | CH               | 162.7          | 8.32, s                  | C                | 161.5          |
| 2''      |                          | C                | 96.6           |                          | CH <sub>3</sub>  | 96.5           |
| 3''      |                          | C                | 184.1          |                          |                  | 181.7          |
| 4''      | 5.74, s                  | CH               | 106.9          | 5.74, s                  |                  | 106.6          |
| 5''      |                          | C                | 165.4          |                          |                  | 165.3          |
| 6''      |                          | C                | 164.9          |                          |                  | 164.9          |
| 7''      | 2.51, s                  | CH <sub>3</sub>  | 18.7           | 2.51, s                  |                  | 18.7           |

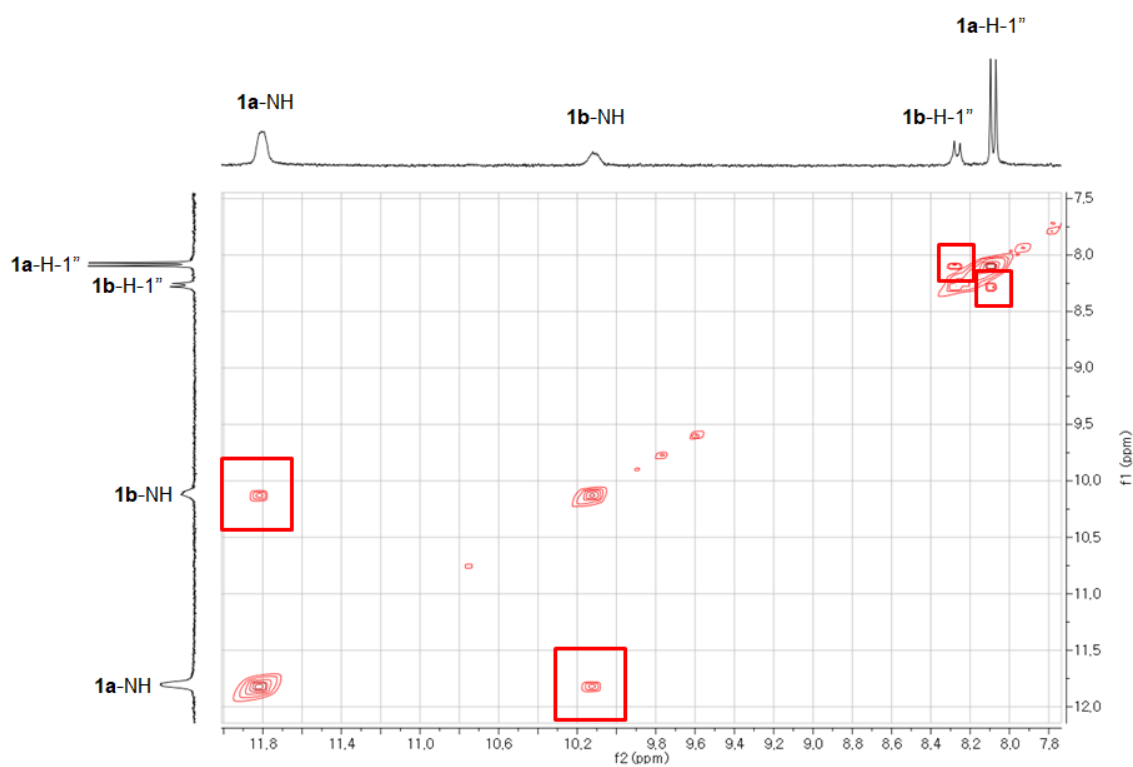

Figure S9. NOESY spectrum of restricticin B (1) for EXSY correlations.

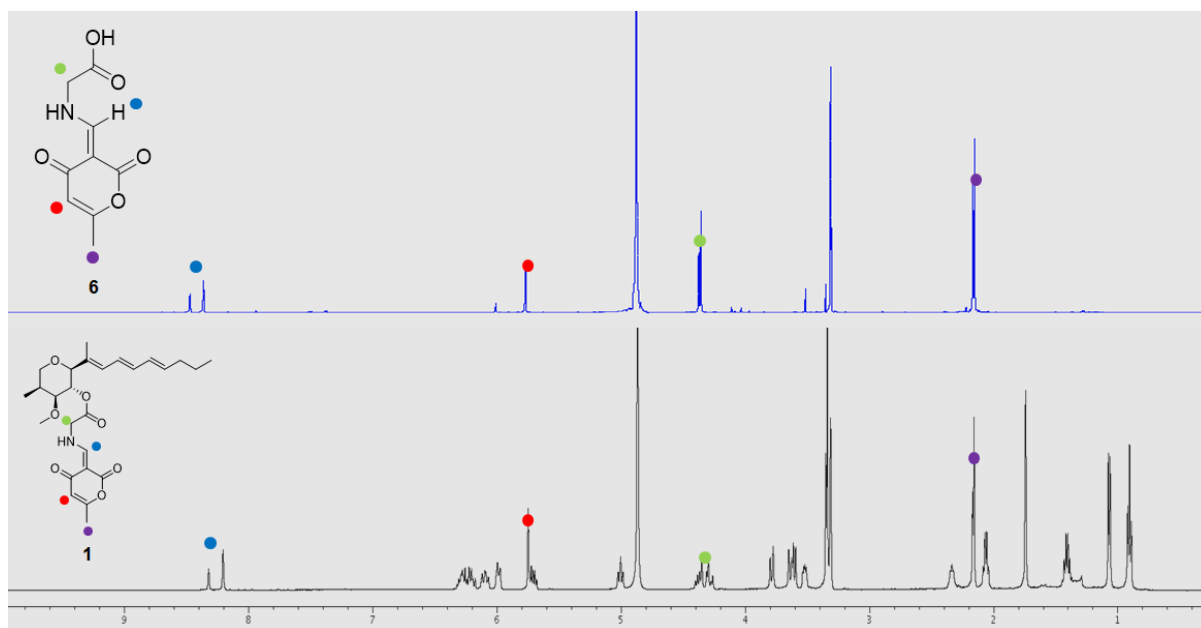

Figure S10. Comparison of the <sup>1</sup>H NMR data between **1** and **6**.

## Elemental Composition Report

Single Mass Analysis

Tolerance = 5.0 PPM / DBE: min = -1.5, max = 50.0

Element prediction: Off

Number of isotope peaks used for i-FIT = 3

Monoisotopic Mass, Even Electron Ions

118 formula(e) evaluated with 1 results within limits (all results (up to 1000) for each mass)

Elements Used:

C: 1-30 H: 1-50 N: 1-3 O: 1-10 Na: 1-1

Minimum: -1.5

Maximum: 100.0 5.0 50.0

| Mass     | Calc. Mass | mDa  | PPM  | DBE | i-FIT | Norm | Conf(%) | Formula                                                          |
|----------|------------|------|------|-----|-------|------|---------|------------------------------------------------------------------|
| 402.2251 | 402.2256   | -0.5 | -1.2 | 5.5 | 884.7 | n/a  | n/a     | C <sub>21</sub> H <sub>33</sub> N <sub>5</sub> O <sub>5</sub> Na |

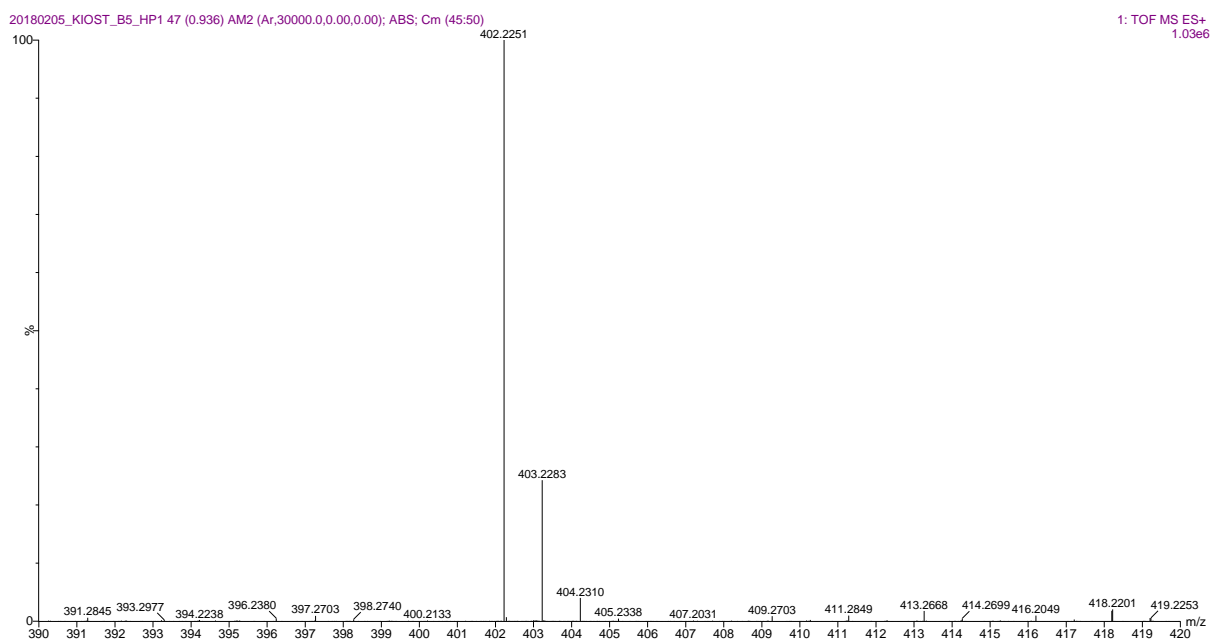

Figure S11. HRESIMS data of N-acetyl restricticin (2).

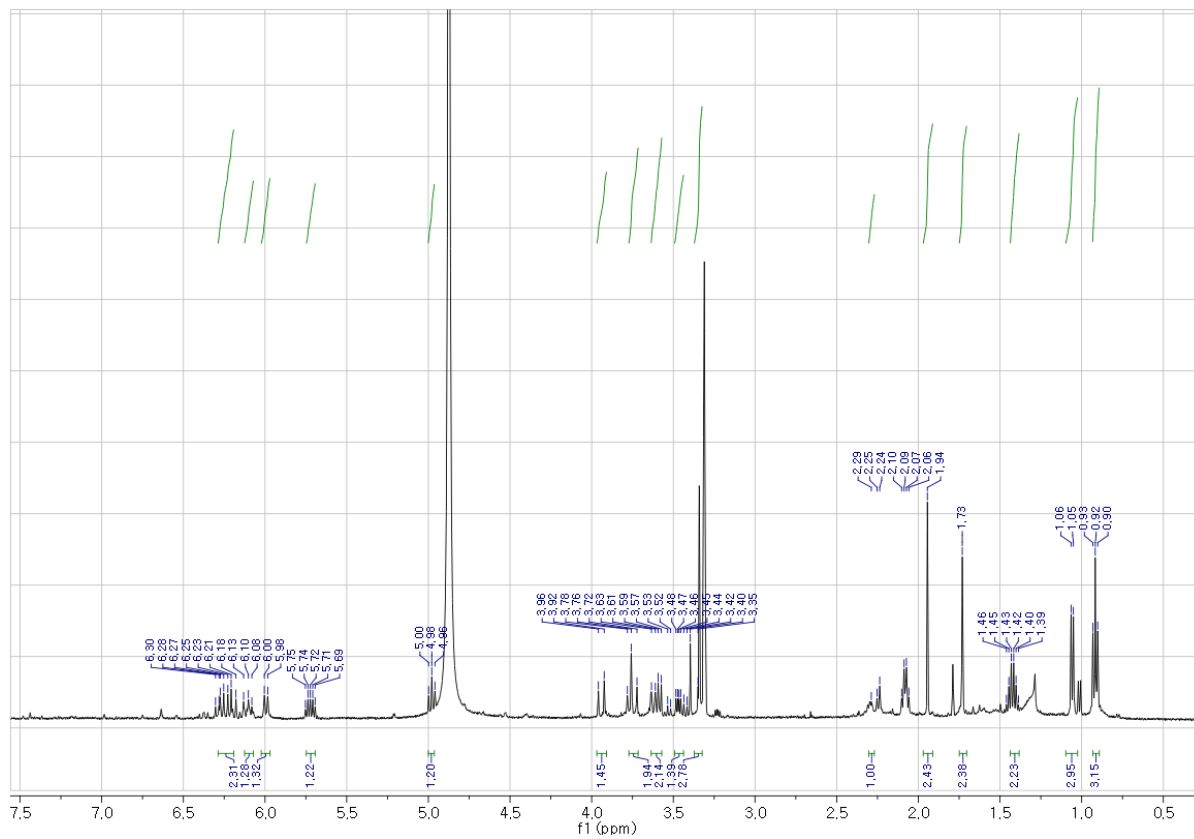

Figure S12. <sup>1</sup>H NMR spectrum of N-acetyl restricticin (2).

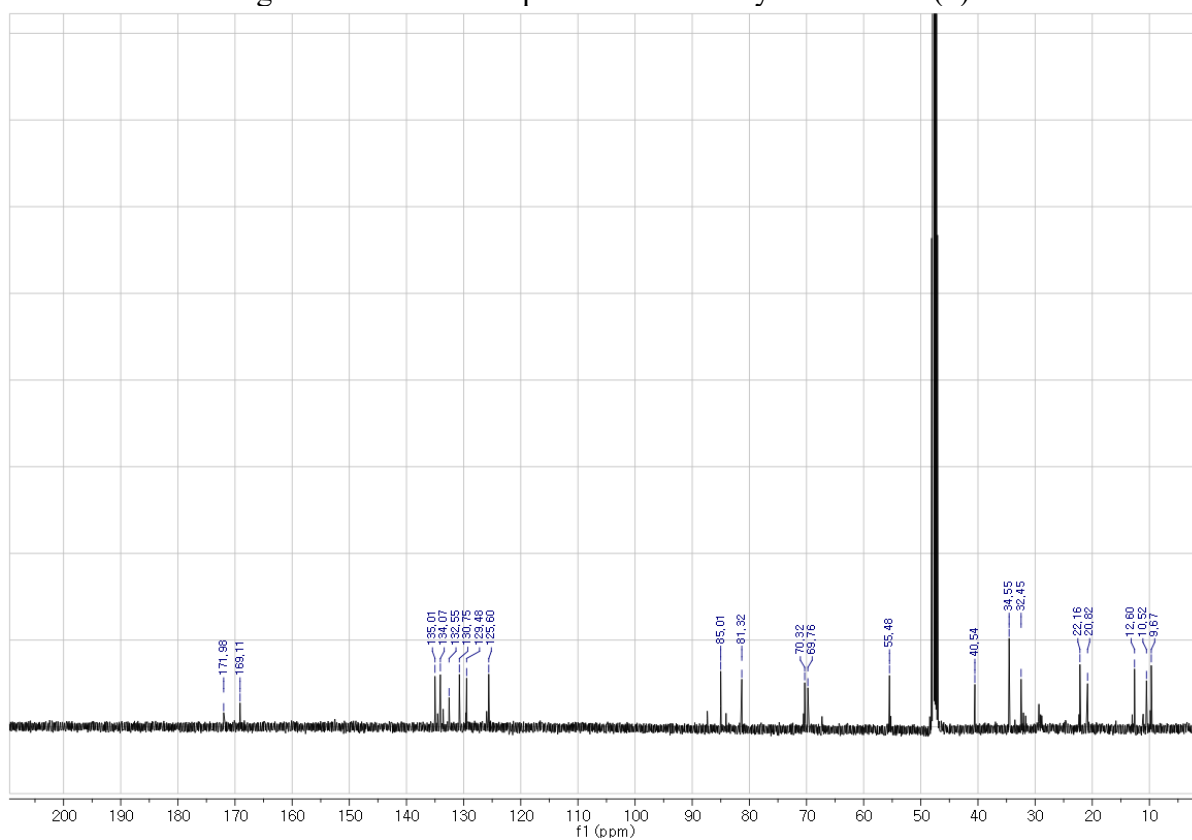

Figure S13. <sup>13</sup>C NMR spectrum of N-acetyl restricticin (2).

F: {0,3} - c ESI corona sid=50.00 det=1600.00 Full ms [1.00-1999.00]

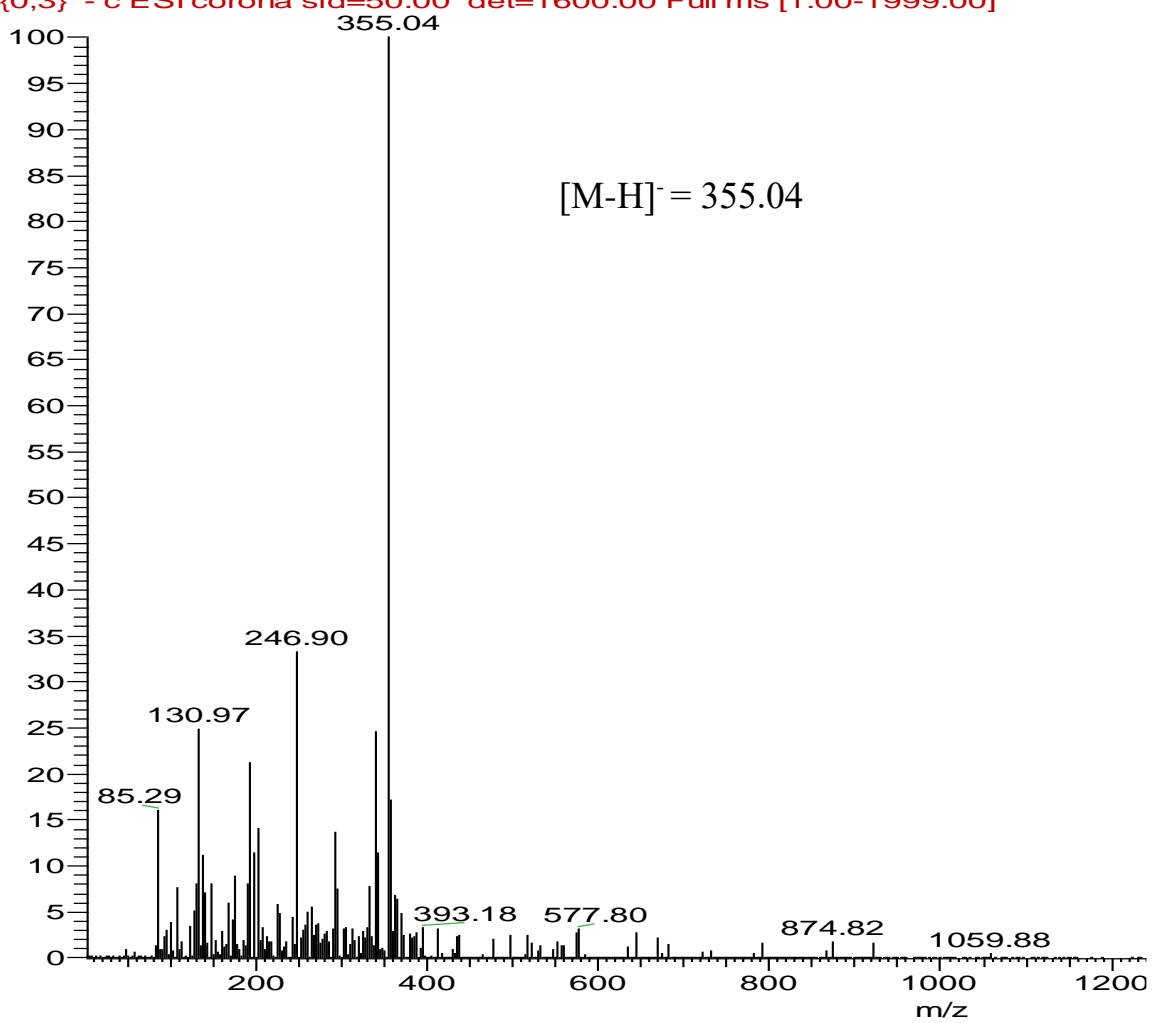

Figure S14. HRESIMS data of 3,3''-dihydroxy-6'-desmethyl terphenyllin (**3**).

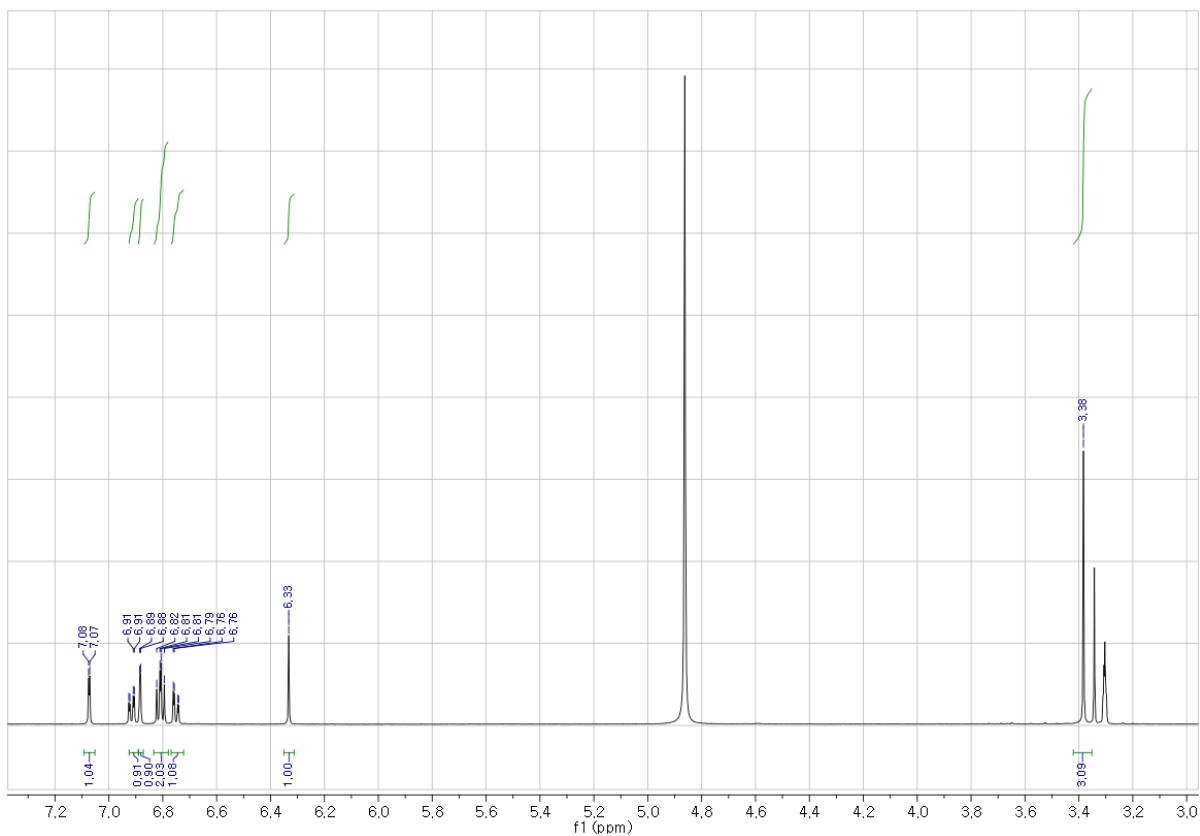

Figure S15.  $^1\text{H}$  NMR spectrum of 3,3''-dihydroxy-6'-desmethyl terphenyllin (**3**).

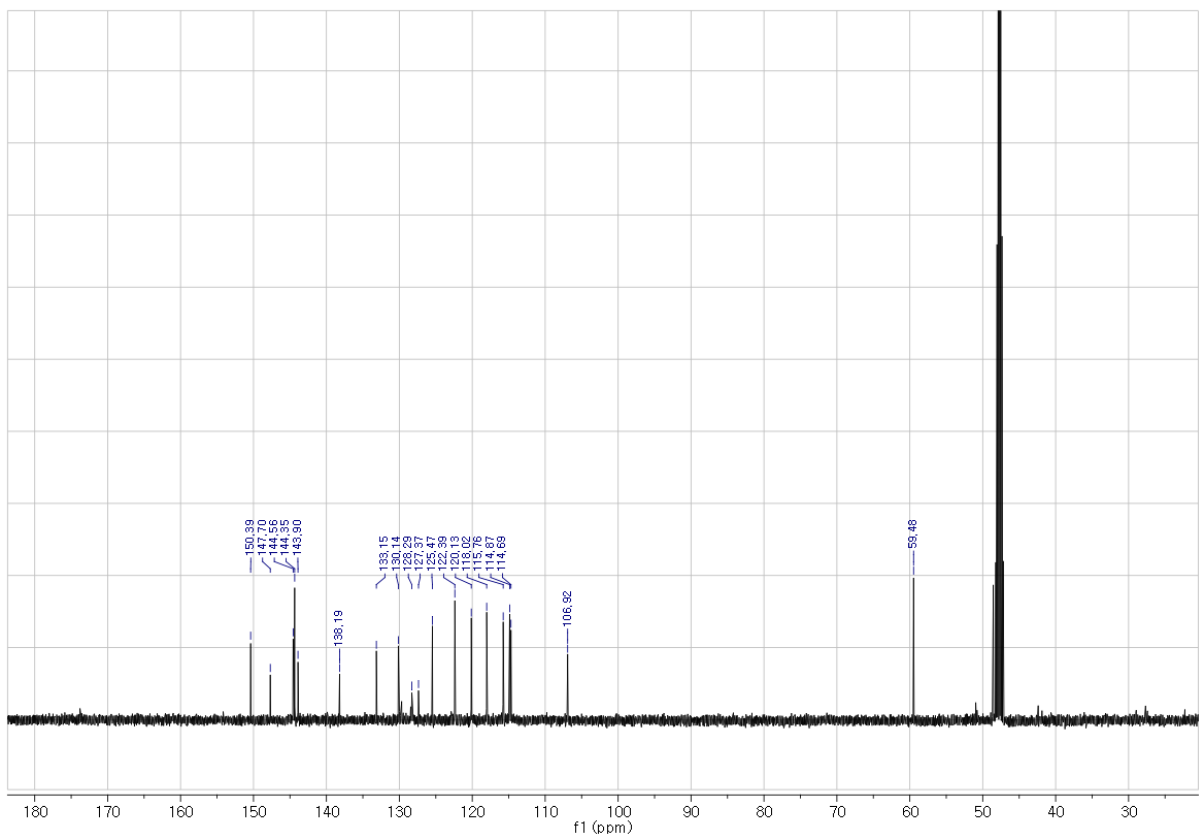

Figure S16.  $^{13}\text{C}$  NMR spectrum of 3,3''-dihydroxy-6'-desmethyl terphenyllin (**3**).



## Elemental Composition Report

Single Mass Analysis

Tolerance = 5.0 PPM / DBE: min = -1.5, max = 50.0

Element prediction: Off

Number of isotope peaks used for i-FIT = 3

Monoisotopic Mass, Even Electron Ions

155 formula(e) evaluated with 1 results within limits (all results (up to 1000) for each mass)

Elements Used:

C: 1-30 H: 1-40 N: 1-5 O: 1-10 Na: 1-1

Minimum: -1.5

Maximum: 100.0 5.0 50.0

| Mass     | Calc. Mass | mDa | PPM | DBE  | i-FIT | Norm | Conf(%) | Formula                                                          |
|----------|------------|-----|-----|------|-------|------|---------|------------------------------------------------------------------|
| 463.2110 | 463.2110   | 0.0 | 0.0 | 15.5 | 720.6 | n/a  | n/a     | C <sub>27</sub> H <sub>28</sub> N <sub>4</sub> O <sub>2</sub> Na |

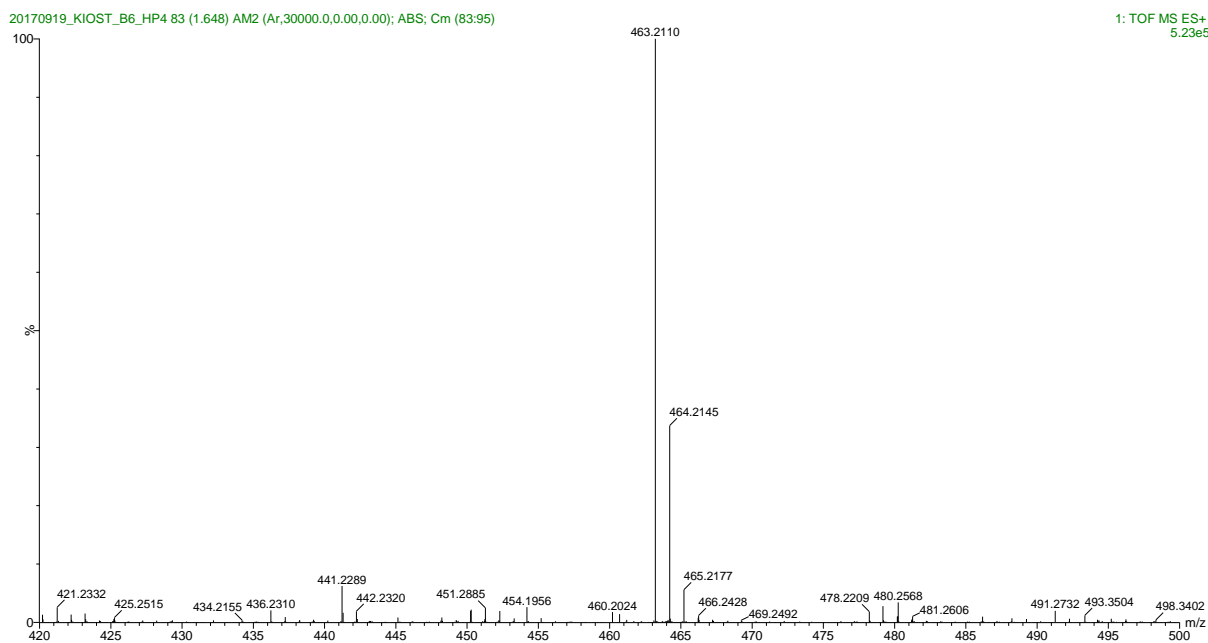

Figure S17. HRESIMS data of fellutanine B (4).

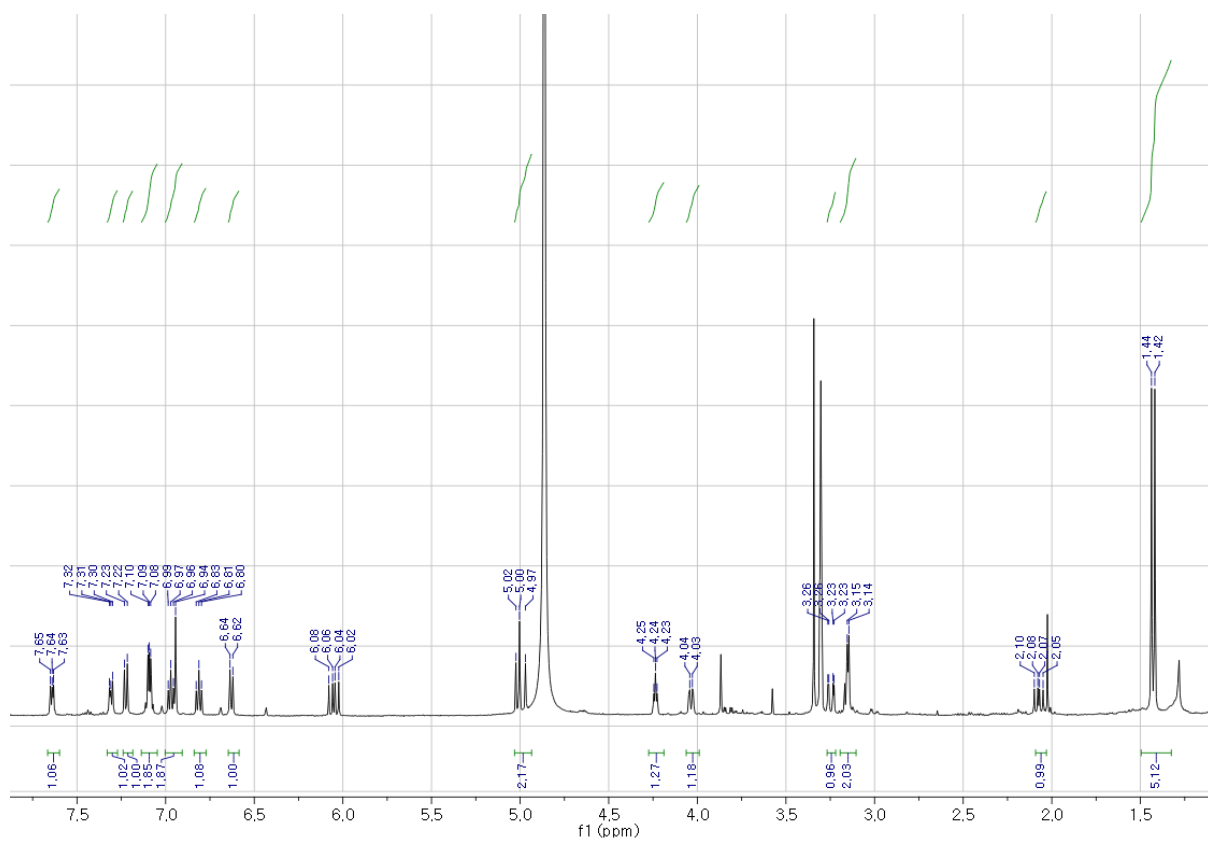

Figure S18. <sup>1</sup>H NMR spectrum of fellutanine B (4).

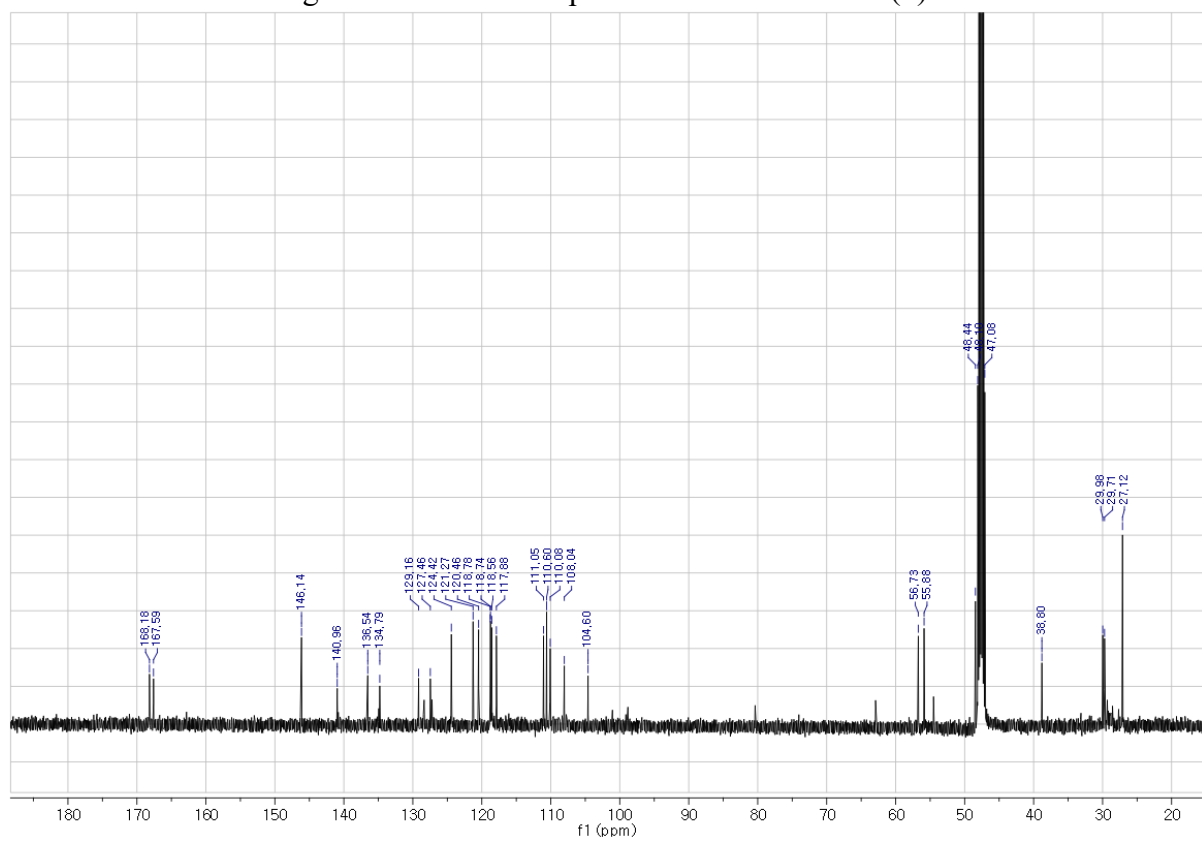

Figure S19. <sup>13</sup>C NMR spectrum of fellutanine B (4).

MC-MPLC-np2-2 #49 RT: 0.60 AV: 1 NL: 1.45E7  
F: {0,0} + c APCI corona sid=30.00 det=1600.00 Full ms [1.00-199]

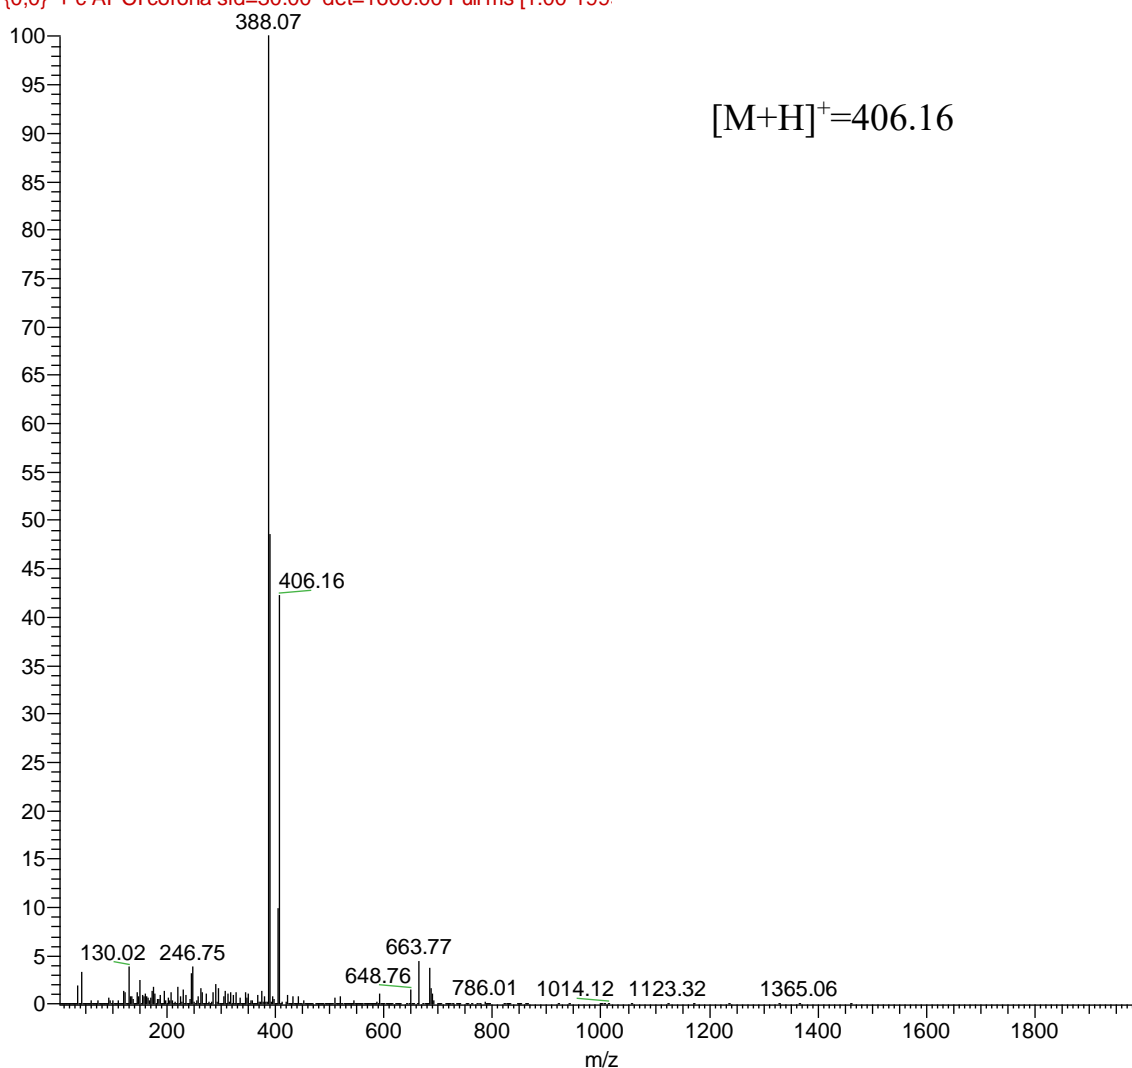

Figure S20. LRMS data of 10,23-dihydro-24,25-dehydro aflavinin (5).



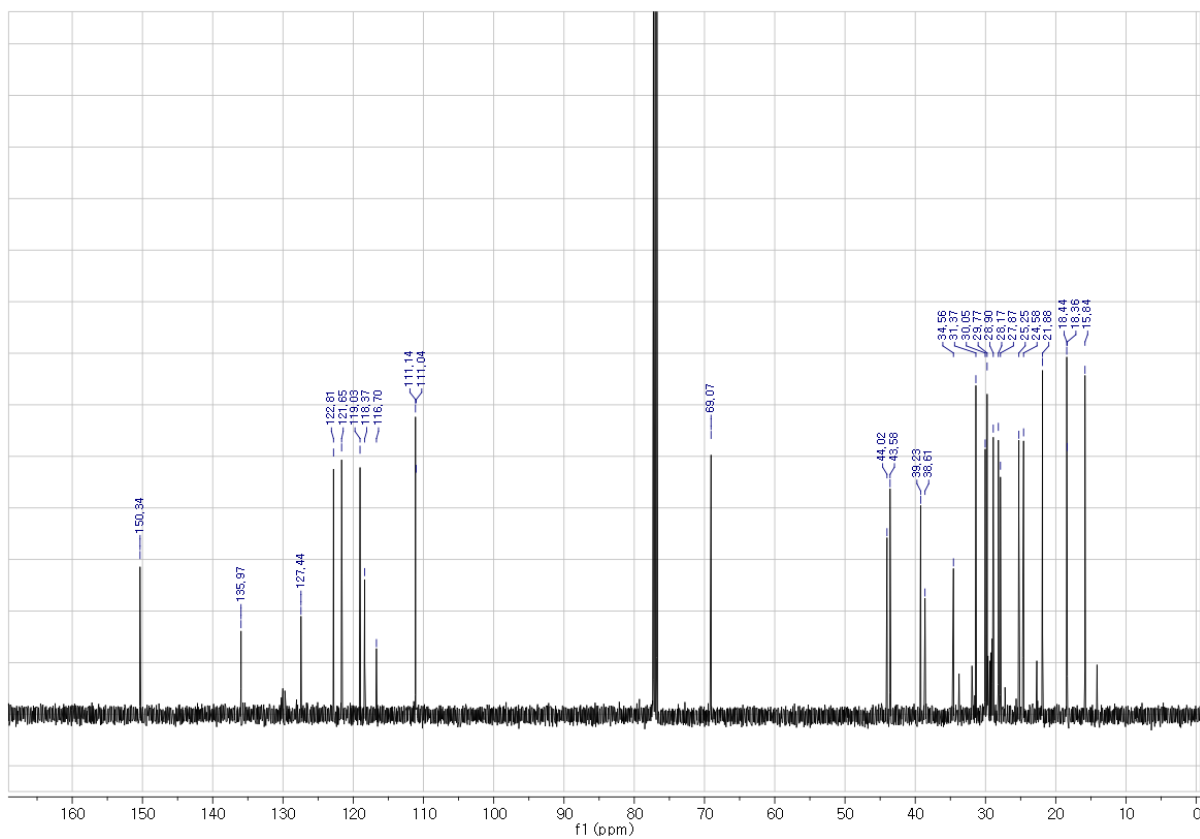

Figure S22.  $^{13}\text{C}$  NMR spectrum of 10,23-dihydro-24,25-dehydro aflavinin (**5**).

Figure S23. DFT optimized conformers and populations of restricticin B (1'S,2'R,3'S,4'S) above 5% population.

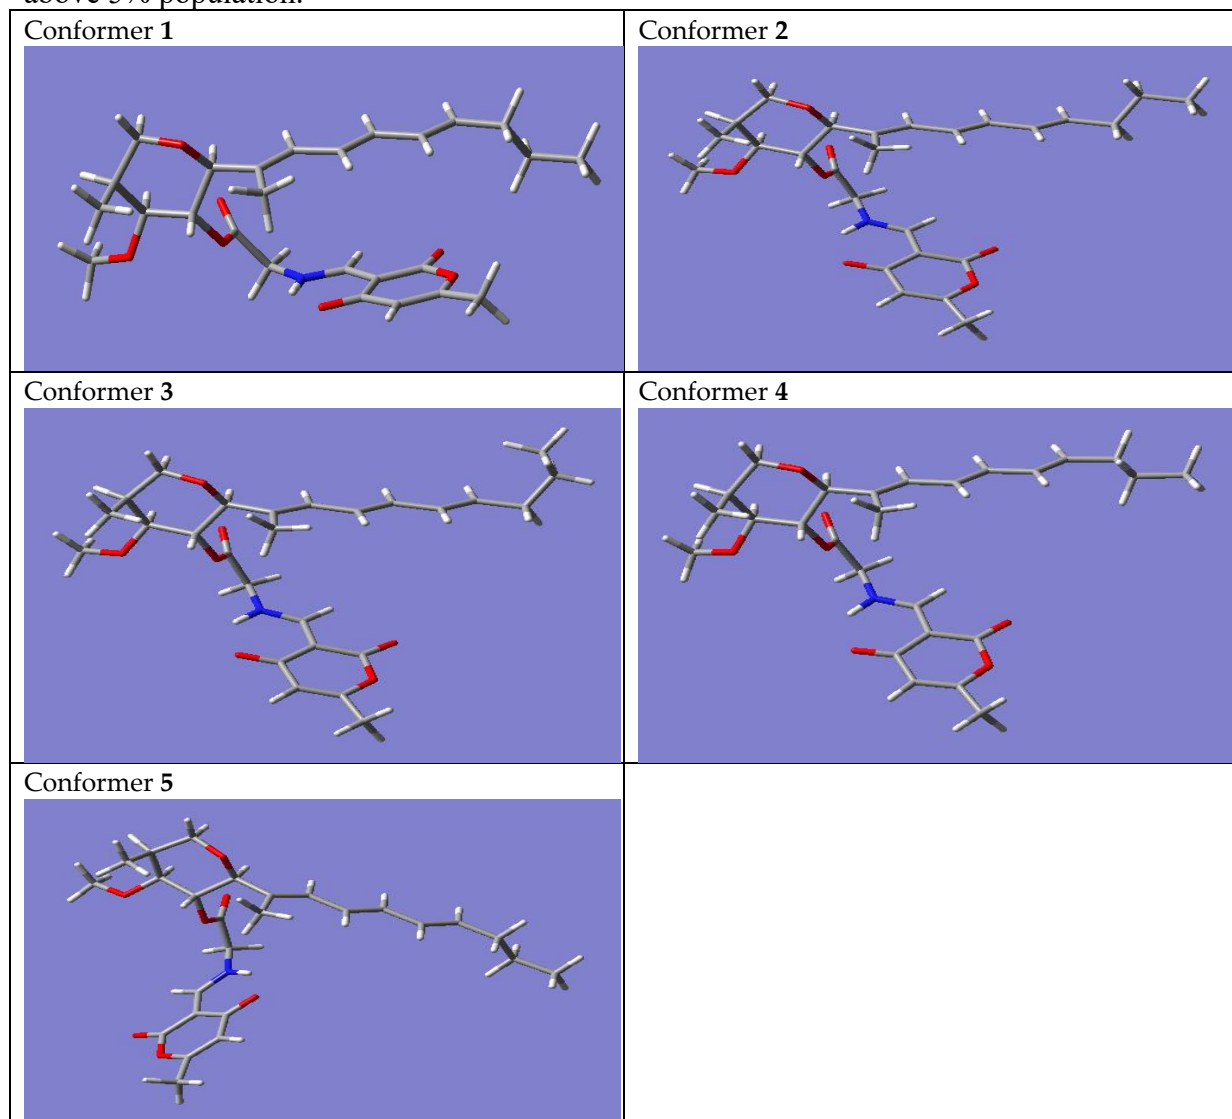

Table S2. Gibbs free energies and Boltzmann distribution of conformers of compound **1**.

| B3LYP/6-31+G(d,p) Gibbs free energy (298.15K) |              |                |
|-----------------------------------------------|--------------|----------------|
|                                               | G (Hartree)  | Population (%) |
| Conformer 1                                   | -1593.089167 | 9.48           |
| Conformer 2                                   | -1593.082241 | 7.93           |
| Conformer 3                                   | -1593.081688 | 6.00           |
| Conformer 4                                   | -1593.081518 | 5.64           |
| Conformer 5                                   | -1593.081505 | 5.54           |

Table S3. ECD calculation and energy minimized coordinates of conformer **1** for all atoms (Å).

| Atom | X       | Y       | Z       | Atom | X       | Y       | Z       |
|------|---------|---------|---------|------|---------|---------|---------|
| C    | -5.8352 | 0.9565  | 0.4930  | H    | -5.6931 | 2.8867  | 1.4903  |
| C    | -5.1268 | 2.2903  | 0.7698  | H    | -2.9002 | 1.9911  | -0.5002 |
| O    | -3.8328 | 2.0952  | 1.3488  | H    | -3.5733 | -0.5204 | 1.1147  |
| C    | -2.9365 | 1.4347  | 0.4456  | H    | -4.8600 | 0.6055  | -1.4094 |
| C    | -3.5196 | 0.0248  | 0.1711  | H    | -0.7436 | 2.4215  | -0.5780 |
| C    | -4.9243 | 0.1067  | -0.4333 | H    | 1.1416  | 1.4315  | 1.6912  |
| C    | -1.5558 | 1.3891  | 1.0562  | H    | -0.5927 | 1.0671  | 2.9738  |
| C    | -0.5237 | 1.9351  | 0.3725  | H    | -2.3332 | 0.7673  | 2.9641  |
| C    | 0.8733  | 1.9098  | 0.7513  | H    | -1.2249 | -0.4006 | 2.2271  |
| C    | -1.4165 | 0.6704  | 2.3762  | H    | 1.6119  | 2.8835  | -0.9700 |
| C    | 1.8679  | 2.4125  | -0.0201 | H    | 3.5272  | 1.8736  | 1.2686  |
| C    | 3.2747  | 2.3399  | 0.3152  | H    | 4.0108  | 3.2433  | -1.4325 |
| C    | 4.2698  | 2.7847  | -0.4765 | H    | 6.1983  | 3.6599  | -0.1883 |
| C    | 5.7336  | 2.6624  | -0.1737 | H    | 5.8719  | 2.2656  | 0.8401  |
| O    | -5.3796 | -1.2280 | -0.6154 | H    | -6.6272 | -0.7606 | 1.5772  |
| C    | -6.2300 | 0.2349  | 1.7889  | H    | -5.3776 | 0.1241  | 2.4653  |
| O    | -2.6023 | -0.8008 | -0.6013 | H    | -6.9990 | 0.8063  | 2.3181  |
| C    | -2.2476 | -0.4893 | -1.8531 | H    | -6.6693 | -2.4146 | -1.6357 |
| O    | -2.6802 | 0.4261  | -2.5209 | H    | -7.4005 | -0.8912 | -1.0803 |
| C    | -6.4910 | -1.3465 | -1.4935 | H    | -6.2811 | -0.8858 | -2.4691 |
| C    | -1.2172 | -1.4953 | -2.3704 | H    | -1.7573 | -2.3919 | -2.6972 |
| C    | 6.4791  | 1.7652  | -1.1843 | H    | -0.7183 | -1.0606 | -3.2368 |
| C    | 7.9770  | 1.6560  | -0.8863 | H    | 6.0195  | 0.7696  | -1.1811 |
| N    | -0.2385 | -1.8505 | -1.3589 | H    | 6.3331  | 2.1673  | -2.1955 |
| C    | 1.0546  | -1.5992 | -1.4412 | H    | 8.4818  | 1.0164  | -1.6176 |
| C    | 1.9658  | -1.8711 | -0.4155 | H    | 8.4594  | 2.6398  | -0.9137 |
| C    | 1.5317  | -2.4181 | 0.8614  | H    | 8.1531  | 1.2288  | 0.1075  |
| C    | 2.5785  | -2.6114 | 1.8500  | H    | -0.5378 | -2.2495 | -0.4598 |
| C    | 3.8620  | -2.2934 | 1.5770  | H    | 1.4233  | -1.1544 | -2.3622 |
| O    | 4.2516  | -1.7788 | 0.3717  | H    | 2.3119  | -3.0161 | 2.8183  |
| C    | 3.3508  | -1.5439 | -0.6706 | H    | 5.4998  | -1.4717 | 2.6719  |
| O    | 3.8261  | -1.0828 | -1.6945 | H    | 4.6999  | -2.8516 | 3.4637  |
| O    | 0.3328  | -2.7009 | 1.1015  | H    | 5.7744  | -3.1061 | 2.0667  |
| C    | 5.0213  | -2.4426 | 2.5052  |      |         |         |         |
| H    | -6.7495 | 1.1894  | -0.0677 |      |         |         |         |
| H    | -5.0314 | 2.8749  | -0.1584 |      |         |         |         |

Table S4. ECD calculation and energy minimized coordinates of conformer **2** for all atoms (Å).

| Atom | X       | Y       | Z       | Atom | X       | Y       | Z       |
|------|---------|---------|---------|------|---------|---------|---------|
| C    | -4.9736 | 2.4854  | 0.6471  | H    | -4.3849 | 4.3436  | 1.6172  |
| C    | -3.9882 | 3.6383  | 0.8818  | H    | -1.9230 | 2.8718  | -0.4670 |
| O    | -2.7454 | 3.1705  | 1.4132  | H    | -3.0475 | 0.5503  | 1.1795  |
| C    | -2.0417 | 2.3357  | 0.4827  | H    | -4.1746 | 1.9399  | -1.2892 |
| C    | -2.9201 | 1.0823  | 0.2355  | H    | 0.2597  | 2.8422  | -0.6247 |
| C    | -4.3014 | 1.4636  | -0.3077 | H    | 2.0237  | 1.6009  | 1.6174  |
| C    | -0.6787 | 2.0146  | 1.0530  | H    | 0.3269  | 1.3782  | 2.8701  |
| C    | 0.4182  | 2.3447  | 0.3323  | H    | -1.3790 | 1.8031  | 3.0710  |
| C    | 1.8037  | 2.1063  | 0.6792  | H    | -0.9330 | 0.2749  | 2.3146  |
| C    | -0.6554 | 1.3338  | 2.3975  | H    | 2.6310  | 2.9783  | -1.0550 |
| C    | 2.8418  | 2.4763  | -0.1098 | H    | 4.4467  | 1.7475  | 1.1557  |
| C    | 4.2359  | 2.2503  | 0.2108  | H    | 5.0448  | 3.1210  | -1.5207 |
| C    | 5.2647  | 2.6160  | -0.5783 | H    | 6.8167  | 1.8419  | 0.6731  |
| C    | 6.7159  | 2.4017  | -0.2653 | H    | 7.1693  | 1.7795  | -1.0521 |
| O    | -5.0364 | 0.2559  | -0.4623 | H    | -6.0592 | 0.9714  | 1.7787  |
| C    | -5.4559 | 1.8632  | 1.9646  | H    | -4.6175 | 1.5787  | 2.6069  |
| O    | -2.2463 | 0.0837  | -0.5853 | H    | -6.0672 | 2.5823  | 2.5189  |
| C    | -1.9150 | 0.3328  | -1.8542 | H    | -6.5914 | -0.6266 | -1.4189 |
| O    | -2.0930 | 1.3705  | -2.4590 | H    | -6.9600 | 1.0132  | -0.8368 |
| C    | -6.1861 | 0.3792  | -1.2889 | H    | -5.9282 | 0.7913  | -2.2746 |
| C    | -1.2935 | -0.8885 | -2.5338 | H    | -2.0277 | -1.2492 | -3.2635 |
| C    | 7.5169  | 3.7164  | -0.1723 | H    | -0.4204 | -0.5482 | -3.0941 |
| C    | 9.0070  | 3.4852  | 0.0930  | H    | 7.3912  | 4.2807  | -1.1056 |
| N    | -0.9160 | -1.9633 | -1.6416 | H    | 7.0888  | 4.3392  | 0.6231  |
| C    | 0.3233  | -2.3737 | -1.4430 | H    | 9.5510  | 4.4331  | 0.1563  |
| C    | 0.6711  | -3.4057 | -0.5668 | H    | 9.1627  | 2.9477  | 1.0353  |
| C    | -0.3353 | -4.1133 | 0.2120  | H    | 9.4634  | 2.8907  | -0.7066 |
| C    | 0.1675  | -5.1668 | 1.0773  | H    | -1.6187 | -2.4557 | -1.0758 |
| C    | 1.4863  | -5.4495 | 1.1369  | H    | 1.1122  | -1.8775 | -2.0031 |
| O    | 2.4179  | -4.7741 | 0.3985  | H    | -0.5373 | -5.7265 | 1.6795  |
| C    | 2.0755  | -3.7381 | -0.4762 | H    | 2.8538  | -6.0512 | 2.6617  |
| O    | 3.0000  | -3.2182 | -1.0761 | H    | 1.3719  | -7.0340 | 2.5688  |
| O    | -1.5563 | -3.8370 | 0.1444  | H    | 2.6603  | -7.2193 | 1.3538  |
| C    | 2.1222  | -6.5022 | 1.9828  |      |         |         |         |
| H    | -5.8412 | 2.9053  | 0.1221  |      |         |         |         |
| H    | -3.8068 | 4.1868  | -0.0556 |      |         |         |         |



Table S5. ECD calculation and energy minimized coordinates of conformer **3** for all atoms (Å).

| Atom | X       | Y       | Z       | Atom | X       | Y       | Z       |
|------|---------|---------|---------|------|---------|---------|---------|
| C    | -4.8499 | 2.5517  | 0.6551  | H    | -4.2082 | 4.4127  | 1.5852  |
| C    | -3.8377 | 3.6878  | 0.8553  | H    | -1.8118 | 2.8569  | -0.5138 |
| O    | -2.5962 | 3.2032  | 1.3744  | H    | -2.9555 | 0.5869  | 1.1903  |
| C    | -1.9250 | 2.3391  | 0.4466  | H    | -4.0928 | 1.9582  | -1.2840 |
| C    | -2.8323 | 1.0999  | 0.2352  | H    | 0.3669  | 2.7863  | -0.7046 |
| C    | -4.2140 | 1.5007  | -0.2928 | H    | 2.1442  | 1.5454  | 1.5272  |
| C    | -0.5591 | 2.0004  | 0.9998  | H    | 0.4640  | 1.3707  | 2.8094  |
| C    | 0.5317  | 2.2998  | 0.2570  | H    | -1.2296 | 1.8325  | 3.0319  |
| C    | 1.9183  | 2.0422  | 0.5858  | H    | -0.8265 | 0.2848  | 2.2911  |
| C    | -0.5267 | 1.3391  | 2.3537  | H    | 2.7329  | 2.8784  | -1.1718 |
| C    | 2.9500  | 2.3848  | -0.2236 | H    | 4.5622  | 1.6450  | 1.0263  |
| C    | 4.3450  | 2.1406  | 0.0791  | H    | 5.1401  | 2.9775  | -1.6752 |
| C    | 5.3674  | 2.4798  | -0.7302 | H    | 6.9306  | 1.7063  | 0.5073  |
| C    | 6.8208  | 2.2330  | -0.4492 | H    | 7.2242  | 1.5650  | -1.2245 |
| O    | -4.9760 | 0.3063  | -0.4160 | H    | -5.9486 | 1.0799  | 1.8291  |
| C    | -5.3233 | 1.9611  | 1.9904  | H    | -4.4805 | 1.6690  | 2.6234  |
| O    | -2.1921 | 0.0736  | -0.5783 | H    | -5.9097 | 2.7022  | 2.5427  |
| C    | -1.8763 | 0.2938  | -1.8565 | H    | -6.5634 | -0.5594 | -1.3339 |
| O    | -2.0439 | 1.3240  | -2.4769 | H    | -6.8894 | 1.0968  | -0.7732 |
| C    | -6.1358 | 0.4398  | -1.2267 | H    | -5.8851 | 0.8306  | -2.2230 |
| C    | -1.2894 | -0.9512 | -2.5237 | H    | -2.0421 | -1.3103 | -3.2351 |
| C    | 7.6763  | 3.5190  | -0.4351 | H    | -0.4190 | -0.6378 | -3.1037 |
| C    | 7.3320  | 4.4746  | 0.7106  | H    | 8.7326  | 3.2312  | -0.3687 |
| N    | -0.9179 | -2.0170 | -1.6182 | H    | 7.5593  | 4.0365  | -1.3964 |
| C    | 0.3158  | -2.4511 | -1.4359 | H    | 7.9633  | 5.3686  | 0.6831  |
| C    | 0.6582  | -3.4744 | -0.5474 | H    | 6.2875  | 4.7988  | 0.6586  |
| C    | -0.3479 | -4.1456 | 0.2634  | H    | 7.4796  | 3.9914  | 1.6835  |
| C    | 0.1489  | -5.1940 | 1.1382  | H    | -1.6201 | -2.4832 | -1.0300 |
| C    | 1.4623  | -5.5044 | 1.1780  | H    | 1.1041  | -1.9829 | -2.0203 |
| O    | 2.3935  | -4.8630 | 0.4095  | H    | -0.5559 | -5.7272 | 1.7640  |
| C    | 2.0566  | -3.8360 | -0.4777 | H    | 2.8460  | -6.1078 | 2.6872  |
| O    | 2.9801  | -3.3477 | -1.1050 | H    | 1.3417  | -7.0595 | 2.6412  |
| O    | -1.5637 | -3.8438 | 0.2140  | H    | 2.6019  | -7.2951 | 1.4053  |
| C    | 2.0918  | -6.5550 | 2.0311  |      |         |         |         |
| H    | -5.7172 | 2.9807  | 0.1370  |      |         |         |         |
| H    | -3.6605 | 4.2175  | -0.0938 |      |         |         |         |

Table S6. ECD calculation and energy minimized coordinates of conformer **4** for all atoms (Å).

| Atom | X       | Y       | Z       | Atom | X       | Y       | Z       |
|------|---------|---------|---------|------|---------|---------|---------|
| C    | -4.8499 | 2.5517  | 0.6551  | H    | -4.2082 | 4.4127  | 1.5852  |
| C    | -3.8377 | 3.6878  | 0.8553  | H    | -1.8118 | 2.8569  | -0.5138 |
| O    | -2.5962 | 3.2032  | 1.3744  | H    | -2.9555 | 0.5869  | 1.1903  |
| C    | -1.9250 | 2.3391  | 0.4466  | H    | -4.0928 | 1.9582  | -1.2840 |
| C    | -2.8323 | 1.0999  | 0.2352  | H    | 0.3669  | 2.7863  | -0.7046 |
| C    | -4.2140 | 1.5007  | -0.2928 | H    | 2.1442  | 1.5454  | 1.5272  |
| C    | -0.5591 | 2.0004  | 0.9998  | H    | 0.4640  | 1.3707  | 2.8094  |
| C    | 0.5317  | 2.2998  | 0.2570  | H    | -1.2296 | 1.8325  | 3.0319  |
| C    | 1.9183  | 2.0422  | 0.5858  | H    | -0.8265 | 0.2848  | 2.2911  |
| C    | -0.5267 | 1.3391  | 2.3537  | H    | 2.7329  | 2.8784  | -1.1718 |
| C    | 2.9500  | 2.3848  | -0.2236 | H    | 4.5622  | 1.6450  | 1.0263  |
| C    | 4.3450  | 2.1406  | 0.0791  | H    | 5.1401  | 2.9775  | -1.6752 |
| C    | 5.3674  | 2.4798  | -0.7302 | H    | 6.9306  | 1.7063  | 0.5073  |
| C    | 6.8208  | 2.2330  | -0.4492 | H    | 7.2242  | 1.5650  | -1.2245 |
| O    | -4.9760 | 0.3063  | -0.4160 | H    | -5.9486 | 1.0799  | 1.8291  |
| C    | -5.3233 | 1.9611  | 1.9904  | H    | -4.4805 | 1.6690  | 2.6234  |
| O    | -2.1921 | 0.0736  | -0.5783 | H    | -5.9097 | 2.7022  | 2.5427  |
| C    | -1.8763 | 0.2938  | -1.8565 | H    | -6.5634 | -0.5594 | -1.3339 |
| O    | -2.0439 | 1.3240  | -2.4769 | H    | -6.8894 | 1.0968  | -0.7732 |
| C    | -6.1358 | 0.4398  | -1.2267 | H    | -5.8851 | 0.8306  | -2.2230 |
| C    | -1.2894 | -0.9512 | -2.5237 | H    | -2.0421 | -1.3103 | -3.2351 |
| C    | 7.6763  | 3.5190  | -0.4351 | H    | -0.4190 | -0.6378 | -3.1037 |
| C    | 7.3320  | 4.4746  | 0.7106  | H    | 8.7326  | 3.2312  | -0.3687 |
| N    | -0.9179 | -2.0170 | -1.6182 | H    | 7.5593  | 4.0365  | -1.3964 |
| C    | 0.3158  | -2.4511 | -1.4359 | H    | 7.9633  | 5.3686  | 0.6831  |
| C    | 0.6582  | -3.4744 | -0.5474 | H    | 6.2875  | 4.7988  | 0.6586  |
| C    | -0.3479 | -4.1456 | 0.2634  | H    | 7.4796  | 3.9914  | 1.6835  |
| C    | 0.1489  | -5.1940 | 1.1382  | H    | -1.6201 | -2.4832 | -1.0300 |
| C    | 1.4623  | -5.5044 | 1.1780  | H    | 1.1041  | -1.9829 | -2.0203 |
| O    | 2.3935  | -4.8630 | 0.4095  | H    | -0.5559 | -5.7272 | 1.7640  |
| C    | 2.0566  | -3.8360 | -0.4777 | H    | 2.8460  | -6.1078 | 2.6872  |
| O    | 2.9801  | -3.3477 | -1.1050 | H    | 1.3417  | -7.0595 | 2.6412  |
| O    | -1.5637 | -3.8438 | 0.2140  | H    | 2.6019  | -7.2951 | 1.4053  |
| C    | 2.0918  | -6.5550 | 2.0311  |      |         |         |         |
| H    | -5.7172 | 2.9807  | 0.1370  |      |         |         |         |
| H    | -3.6605 | 4.2175  | -0.0938 |      |         |         |         |

Table S7. ECD calculation and energy minimized coordinates of conformer **5** for all atoms (Å).

| Atom | X       | Y       | Z       | Atom | X       | Y       | Z       |
|------|---------|---------|---------|------|---------|---------|---------|
| C    | -3.2052 | 4.1731  | 0.5704  | H    | -2.0326 | 5.6511  | 1.6571  |
| C    | -1.8802 | 4.8737  | 0.9034  | H    | -0.1844 | 3.4479  | -0.4073 |
| O    | -0.9239 | 3.9658  | 1.4592  | H    | -2.1554 | 1.6684  | 1.1120  |
| C    | -0.5302 | 2.9608  | 0.5133  | H    | -2.5543 | 3.4174  | -1.3532 |
| C    | -1.7925 | 2.1244  | 0.1896  | H    | 1.8894  | 2.7620  | -0.4254 |
| C    | -2.9034 | 2.9990  | -0.3996 | H    | 2.9551  | 0.7981  | 1.7398  |
| C    | 0.5983  | 2.1463  | 1.1032  | H    | 1.1904  | 1.1243  | 2.9253  |
| C    | 1.7968  | 2.1542  | 0.4748  | H    | -0.3773 | 1.9365  | 3.0078  |
| C    | 2.9933  | 1.4340  | 0.8575  | H    | -0.2115 | 0.4174  | 2.1207  |
| C    | 0.2907  | 1.3651  | 2.3561  | H    | 4.2013  | 2.1398  | -0.7214 |
| C    | 4.1573  | 1.5085  | 0.1671  | H    | 5.3265  | 0.1687  | 1.4110  |
| C    | 5.3699  | 0.8015  | 0.5235  | H    | 6.5583  | 1.5182  | -1.0527 |
| C    | 6.5252  | 0.8845  | -0.1644 | H    | 8.5921  | 0.8915  | 0.3641  |
| C    | 7.7924  | 0.1584  | 0.1772  | H    | 7.6604  | -0.4051 | 1.1095  |
| O    | -4.0213 | 2.1533  | -0.6380 | H    | -4.8384 | 3.1420  | 1.5815  |
| C    | -3.9600 | 3.7402  | 1.8349  | H    | -3.3260 | 3.1478  | 2.5009  |
| O    | -1.4851 | 0.9557  | -0.6219 | H    | -4.2933 | 4.6204  | 2.3936  |
| C    | -1.0027 | 1.0682  | -1.8610 | H    | -5.7338 | 1.9307  | -1.7011 |
| O    | -0.7965 | 2.0990  | -2.4684 | H    | -5.5061 | 3.5765  | -1.0660 |
| C    | -4.9951 | 2.7120  | -1.5096 | H    | -4.5469 | 3.0224  | -2.4640 |
| C    | -0.7226 | -0.3013 | -2.4870 | H    | -1.4541 | -0.4602 | -3.2847 |
| C    | 8.2656  | -0.7931 | -0.9406 | H    | 0.2635  | -0.2399 | -2.9563 |
| C    | 9.5885  | -1.4881 | -0.6069 | H    | 7.4862  | -1.5432 | -1.1239 |
| N    | -0.7687 | -1.4087 | -1.5583 | H    | 8.3720  | -0.2257 | -1.8744 |
| C    | -1.6966 | -2.3477 | -1.5451 | H    | 9.9003  | -2.1576 | -1.4150 |
| C    | -1.7652 | -3.3562 | -0.5796 | H    | 10.3903 | -0.7577 | -0.4499 |
| C    | -0.8228 | -3.4123 | 0.5287  | H    | 9.5020  | -2.0864 | 0.3072  |
| C    | -1.0251 | -4.5002 | 1.4698  | H    | -0.1082 | -1.4654 | -0.7719 |
| C    | -2.0274 | -5.3893 | 1.3023  | H    | -2.4426 | -2.3287 | -2.3360 |
| O    | -2.9030 | -5.3223 | 0.2545  | H    | -0.3535 | -4.5892 | 2.3145  |
| C    | -2.8276 | -4.3265 | -0.7243 | H    | -2.2837 | -7.4829 | 1.6306  |
| O    | -3.6688 | -4.3775 | -1.6044 | H    | -1.6313 | -6.5908 | 3.0267  |
| O    | 0.1040  | -2.5784 | 0.6688  | H    | -3.3525 | -6.4583 | 2.5900  |
| C    | -2.3348 | -6.5456 | 2.1947  |      |         |         |         |
| H    | -3.8242 | 4.8985  | 0.0271  |      |         |         |         |
| H    | -1.4591 | 5.3475  | 0.0031  |      |         |         |         |
